# Supplementary material for: Suppressing circ_0008494 inhibits HSC s activation by regulating the miR-185-3p/ Col1a1 axis
Source: Research Square preprint supplement (doi:10.21203/rs.3.rs-1424258/v1), 2022-03-29
Supplement: Supplementary file 1 [file 1f9de0bd9ebfb6cba31f3899.xlsx]

## Sheet: Sheet1
gene	group	Replicate #	Threshold Cycle (Ct)	Ct Mean	Ct Std. Dev		gene	group	Replicate #	Threshold Cycle (Ct)	Ct Mean	Ct Std. Dev		ΔCt	STDDEV		ΔΔCT (Target-Aveg Control)	2^-ΔΔCt		Low	HIGH	Error-	Error+
circ-0008494	0h	1	22.0481				GAPDH	NC	1
circ-0008494	0h	2	22.4168				GAPDH	NC	2	12.354
circ-0008494	0h	3	22.6309	22.3653	0.294797		GAPDH	NC	3	12.2727	12.3133	0.0574729		10.0519	0.300348		0	1		0.812057	1.23144	0.187943	0.231441
circ-0008494	4h	1	21.9894				GAPDH	NC	1	12.324
circ-0008494	4h	2	21.9181				GAPDH	NC	2
circ-0008494	4h	3		21.9538	0.0504683		GAPDH	NC	3	12.2379	12.2809	0.0608741		9.67282	0.0790741		-0.379117	1.30055		1.23118	1.37382	0.0693646	0.0732726
circ-0008494	8h	1	21.951				GAPDH	NC	1	13.2737
circ-0008494	8h	2	21.9347				GAPDH	NC	2
circ-0008494	8h	3	21.9931	21.9596	0.0301241		GAPDH	NC	3	12.9937	13.1337	0.197952		8.82587	0.200231		-1.22606	2.33928		2.03613	2.68756	0.303145	0.348278
circ-0008494	12h	1	21.8296				GAPDH	NC	1	12.7478
circ-0008494	12h	2	21.9346				GAPDH	NC	2	12.7309
circ-0008494	12h	3	21.941	21.9017	0.0625433		GAPDH	NC	3	12.566	12.6816	0.100467		9.22015	0.118344		-0.831784	1.77989		1.63971	1.93204	0.140176	0.152159
circ-0008494	24h	1	21.9446				GAPDH	NC	1
circ-0008494	24h	2	21.8527				GAPDH	NC	2	12.7951
circ-0008494	24h	3	21.969	21.9221	0.06131		GAPDH	NC	3	12.5837	12.6894	0.149487		9.23267	0.161571		-0.81926	1.7645		1.57755	1.9736	0.186947	0.209101
ARID1A mRNA	0h	1	21.3155				GAPDH	NC	1	12.2682
ARID1A mRNA	0h	2					GAPDH	NC	2	12.1866
ARID1A mRNA	0h	3	21.3812	21.3484	0.0464986		GAPDH	NC	3		12.2274	0.0577487		9.12096	0.074142		0	1		0.949907	1.05273	0.0500931	0.0527348
ARID1A mRNA	4h	1	22.672				GAPDH	NC	1	12.2689
ARID1A mRNA	4h	2	22.6121				GAPDH	NC	2	12.1616
ARID1A mRNA	4h	3	22.7132	22.6658	0.0508457		GAPDH	NC	3	12.7491	12.3932	0.312851		10.2725	0.316956		1.15157	0.450137		0.361353	0.560735	0.088784	0.110598
ARID1A mRNA	8h	1	23.312				GAPDH	NC	1	12.9229
ARID1A mRNA	8h	2	23.3272				GAPDH	NC	2	13.7603
ARID1A mRNA	8h	3	23.4431	23.3608	0.0716889		GAPDH	NC	3	13.0409	13.2414	0.45327		10.1194	0.458904		0.998456	0.500535		0.364159	0.687984	0.136376	0.187449
ARID1A mRNA	12h	1	24.1346				GAPDH	NC	1	13.4205
ARID1A mRNA	12h	2	24.0616				GAPDH	NC	2	13.1527
ARID1A mRNA	12h	3	24.2723	24.1562	0.106963		GAPDH	NC	3	12.6527	13.0753	0.389667		11.0809	0.404081		1.95993	0.257041		0.194251	0.340129	0.0627906	0.0830874
ARID1A mRNA	24h	1	26.2737				GAPDH	NC	1	13.7108
ARID1A mRNA	24h	2	26.1751				GAPDH	NC	2	13.6134
ARID1A mRNA	24h	3	26.3221	26.257	0.0749053		GAPDH	NC	3	13.0463	13.4568	0.358837		12.8001	0.366571		3.67917	0.0780655		0.0605494	0.100649	0.0175161	0.0225832
Statistical analysis:t tests	T-Test：	0h	0.9201
		4h	0.0003
p value circ-0008494 vs p value ARID1A mRNA		8h	0.0009
		12h	<0.0001
		24h	0.0001

## Sheet: CT
SDS 2.4	AQ Results	1
Filename	2022-01-20
PlateID
Assay Type	Absolute Quantification
Run DateTime	2022-01-20 16:53:22
Operator
ThermalCycleParams
Sample Information
Well	Sample Name	Detector Name	Reporter	Task	Ct	Tm Value	Tm Type	Quantity	Qty Mean	Qty StdDev	Ct Median	Ct Mean	Ct StdDev	Ct Type	Template Name	Baseline Type	Baseline Start	Baseline Stop	Threshold Type	Threshold	FOS	HMD	LME	EW	BPR	NAW	HNS	HRN	EAF	BAF	TAF	CAF
1	A1	test	FAM	Unknown	13.8285	86.7	Auto Tm							Automatic Ct		Automatic			Automatic	2.54807
10	A10	test	FAM	Unknown	21.3155	83.5	Auto Tm							Automatic Ct		Automatic			Automatic	2.54807
11	A11	test	FAM	Unknown	19.778	83.3	Auto Tm							Automatic Ct		Automatic			Automatic	2.54807
12	A12	test	FAM	Unknown	21.3812	83.1	Auto Tm							Automatic Ct		Automatic			Automatic	2.54807
2	A2	test	FAM	Unknown	12.354	86.9	Auto Tm							Automatic Ct		Automatic			Automatic	2.54807
3	A3	test	FAM	Unknown	12.2727	86.9	Auto Tm							Automatic Ct		Automatic			Automatic	2.54807
4	A4	test	FAM	Unknown	22.0481	83.8	Auto Tm							Automatic Ct		Automatic			Automatic	2.54807
5	A5	test	FAM	Unknown	22.4168	84.2	Auto Tm							Automatic Ct		Automatic			Automatic	2.54807
6	A6	test	FAM	Unknown	22.6309	84.5	Auto Tm							Automatic Ct		Automatic			Automatic	2.54807
7	A7	test	FAM	Unknown	12.2682	87.8	Auto Tm							Automatic Ct		Automatic			Automatic	2.54807
8	A8	test	FAM	Unknown	12.1866	87.3	Auto Tm							Automatic Ct		Automatic			Automatic	2.54807
9	A9	test	FAM	Unknown	13.3658	86.9	Auto Tm							Automatic Ct		Automatic			Automatic	2.54807
13	B1	test	FAM	Unknown	12.324	86.9	Auto Tm							Automatic Ct		Automatic			Automatic	2.54807
22	B10	test	FAM	Unknown	22.672	83.7	Auto Tm							Automatic Ct		Automatic			Automatic	2.54807
23	B11	test	FAM	Unknown	22.6121	83.5	Auto Tm							Automatic Ct		Automatic			Automatic	2.54807
24	B12	test	FAM	Unknown	22.7132	83.1	Auto Tm							Automatic Ct		Automatic			Automatic	2.54807
14	B2	test	FAM	Unknown	13.674	86.9	Auto Tm							Automatic Ct		Automatic			Automatic	2.54807
15	B3	test	FAM	Unknown	12.2379	87.2	Auto Tm							Automatic Ct		Automatic			Automatic	2.54807
16	B4	test	FAM	Unknown	21.9894	84.2	Auto Tm							Automatic Ct		Automatic			Automatic	2.54807
17	B5	test	FAM	Unknown	21.9181	84.3	Auto Tm							Automatic Ct		Automatic			Automatic	2.54807
18	B6	test	FAM	Unknown	20.5375	84.7	Auto Tm							Automatic Ct		Automatic			Automatic	2.54807
19	B7	test	FAM	Unknown	12.2689	88	Auto Tm							Automatic Ct		Automatic			Automatic	2.54807
20	B8	test	FAM	Unknown	12.1616	87.6	Auto Tm							Automatic Ct		Automatic			Automatic	2.54807
21	B9	test	FAM	Unknown	12.7491	87.2	Auto Tm							Automatic Ct		Automatic			Automatic	2.54807
25	C1	test	FAM	Unknown	13.2737	86.9	Auto Tm							Automatic Ct		Automatic			Automatic	2.54807
34	C10	test	FAM	Unknown	23.312	84.1	Auto Tm							Automatic Ct		Automatic			Automatic	2.54807
35	C11	test	FAM	Unknown	23.3272	83.7	Auto Tm							Automatic Ct		Automatic			Automatic	2.54807
36	C12	test	FAM	Unknown	23.4431	83.3	Auto Tm							Automatic Ct		Automatic			Automatic	2.54807
26	C2	test	FAM	Unknown	13.9657	87.4	Auto Tm							Automatic Ct		Automatic			Automatic	2.54807
27	C3	test	FAM	Unknown	12.9937	87.8	Auto Tm							Automatic Ct		Automatic			Automatic	2.54807
28	C4	test	FAM	Unknown	21.951	84.7	Auto Tm							Automatic Ct		Automatic			Automatic	2.54807
29	C5	test	FAM	Unknown	21.9347	84.7	Auto Tm							Automatic Ct		Automatic			Automatic	2.54807
30	C6	test	FAM	Unknown	21.9931	84.9	Auto Tm							Automatic Ct		Automatic			Automatic	2.54807
31	C7	test	FAM	Unknown	12.9229	88.1	Auto Tm							Automatic Ct		Automatic			Automatic	2.54807
32	C8	test	FAM	Unknown	13.7603	87.8	Auto Tm							Automatic Ct		Automatic			Automatic	2.54807
33	C9	test	FAM	Unknown	13.0409	87.3	Auto Tm							Automatic Ct		Automatic			Automatic	2.54807
37	D1	test	FAM	Unknown	12.4304	87.3	Auto Tm							Automatic Ct		Automatic			Automatic	2.54807
46	D10	test	FAM	Unknown	24.1346	84.6	Auto Tm							Automatic Ct		Automatic			Automatic	2.54807
47	D11	test	FAM	Unknown	24.0616	84.2	Auto Tm							Automatic Ct		Automatic			Automatic	2.54807
48	D12	test	FAM	Unknown	24.2723	83.7	Auto Tm							Automatic Ct		Automatic			Automatic	2.54807
38	D2	test	FAM	Unknown	13.371	88	Auto Tm							Automatic Ct		Automatic			Automatic	2.54807
39	D3	test	FAM	Unknown	13.2533	88.8	Auto Tm							Automatic Ct		Automatic			Automatic	2.54807
40	D4	test	FAM	Unknown	21.9706	85.5	Auto Tm							Automatic Ct		Automatic			Automatic	2.54807
41	D5	test	FAM	Unknown	22.0125	85.3	Auto Tm							Automatic Ct		Automatic			Automatic	2.54807
42	D6	test	FAM	Unknown	22.1575	85.3	Auto Tm							Automatic Ct		Automatic			Automatic	2.54807
43	D7	test	FAM	Unknown	13.4205	88.3	Auto Tm							Automatic Ct		Automatic			Automatic	2.54807
44	D8	test	FAM	Unknown	13.1527	87.9	Auto Tm							Automatic Ct		Automatic			Automatic	2.54807
45	D9	test	FAM	Unknown	12.6527	87.8	Auto Tm							Automatic Ct		Automatic			Automatic	2.54807
49	E1	test	FAM	Unknown	12.7478	87.1	Auto Tm							Automatic Ct		Automatic			Automatic	2.54807
58	E10	test	FAM	Unknown	26.2737	84.6	Auto Tm							Automatic Ct		Automatic			Automatic	2.54807
59	E11	test	FAM	Unknown	26.1751	84.2	Auto Tm							Automatic Ct		Automatic			Automatic	2.54807
60	E12	test	FAM	Unknown	26.3221	83.9	Auto Tm							Automatic Ct		Automatic			Automatic	2.54807
50	E2	test	FAM	Unknown	12.7309	88	Auto Tm							Automatic Ct		Automatic			Automatic	2.54807
51	E3	test	FAM	Unknown	12.566	88.8	Auto Tm							Automatic Ct		Automatic			Automatic	2.54807
52	E4	test	FAM	Unknown	21.8296	85.3	Auto Tm							Automatic Ct		Automatic			Automatic	2.54807
53	E5	test	FAM	Unknown	21.9346	85.1	Auto Tm							Automatic Ct		Automatic			Automatic	2.54807
54	E6	test	FAM	Unknown	21.941	85.1	Auto Tm							Automatic Ct		Automatic			Automatic	2.54807
55	E7	test	FAM	Unknown	12.7038	88.5	Auto Tm							Automatic Ct		Automatic			Automatic	2.54807
56	E8	test	FAM	Unknown	13.6674	88.1	Auto Tm							Automatic Ct		Automatic			Automatic	2.54807
57	E9	test	FAM	Unknown	12.5973	87.9	Auto Tm							Automatic Ct		Automatic			Automatic	2.54807
61	F1	test	FAM	Unknown	13.7305	86.9	Auto Tm							Automatic Ct		Automatic			Automatic	2.54807
70	F10	test	FAM	Unknown	26.305	84.1	Auto Tm							Automatic Ct		Automatic			Automatic	2.54807
71	F11	test	FAM	Unknown	26.2863	83.9	Auto Tm							Automatic Ct		Automatic			Automatic	2.54807
72	F12	test	FAM	Unknown	26.6093	83.5	Auto Tm							Automatic Ct		Automatic			Automatic	2.54807
62	F2	test	FAM	Unknown	12.7951	87.2	Auto Tm							Automatic Ct		Automatic			Automatic	2.54807
63	F3	test	FAM	Unknown	12.5837	87.6	Auto Tm							Automatic Ct		Automatic			Automatic	2.54807
64	F4	test	FAM	Unknown	21.9446	84.5	Auto Tm							Automatic Ct		Automatic			Automatic	2.54807
65	F5	test	FAM	Unknown	21.8527	84.5	Auto Tm							Automatic Ct		Automatic			Automatic	2.54807
66	F6	test	FAM	Unknown	21.969	84.7	Auto Tm							Automatic Ct		Automatic			Automatic	2.54807
67	F7	test	FAM	Unknown	13.7108	88.1	Auto Tm							Automatic Ct		Automatic			Automatic	2.54807
68	F8	test	FAM	Unknown	13.6134	87.8	Auto Tm							Automatic Ct		Automatic			Automatic	2.54807
69	F9	test	FAM	Unknown	13.0463	87.5	Auto Tm							Automatic Ct		Automatic			Automatic	2.54807
73	G1	test	FAM	Unknown	24.6195	87.4	Auto Tm							Automatic Ct		Automatic			Automatic	2.54807
82	G10	test	FAM	Unknown	Undetermined	73.6	Auto Tm							Automatic Ct		Automatic			Automatic	2.54807				TRUE		TRUE			TRUE
83	G11	test	FAM	Unknown	Undetermined	77	Auto Tm							Automatic Ct		Automatic			Automatic	2.54807				TRUE		TRUE			TRUE
84	G12	test	FAM	Unknown	Undetermined	84.1	Auto Tm							Automatic Ct		Automatic			Automatic	2.54807				TRUE		TRUE
74	G2	test	FAM	Unknown	24.6214	87.8	Auto Tm							Automatic Ct		Automatic			Automatic	2.54807
75	G3	test	FAM	Unknown	24.7825	88	Auto Tm							Automatic Ct		Automatic			Automatic	2.54807
76	G4	test	FAM	Unknown	28.602	88.2	Auto Tm							Automatic Ct		Automatic			Automatic	2.54807
77	G5	test	FAM	Unknown	29.4508	88.1	Auto Tm							Automatic Ct		Automatic			Automatic	2.54807
78	G6	test	FAM	Unknown	28.6378	88.5	Auto Tm							Automatic Ct		Automatic			Automatic	2.54807
79	G7	test	FAM	Unknown	28.5492	88.5	Auto Tm							Automatic Ct		Automatic			Automatic	2.54807
80	G8	test	FAM	Unknown	28.5441	88.3	Auto Tm							Automatic Ct		Automatic			Automatic	2.54807
81	G9	test	FAM	Unknown	28.8789	88.1	Auto Tm							Automatic Ct		Automatic			Automatic	2.54807
85	H1	test	FAM	Unknown	24.7367	87.4	Auto Tm							Automatic Ct		Automatic			Automatic	2.54807
94	H10	test	FAM	Unknown	Undetermined	71.1	Auto Tm							Automatic Ct		Automatic			Automatic	2.54807				TRUE		TRUE
95	H11	test	FAM	Unknown	Undetermined	84.9	Auto Tm							Automatic Ct		Automatic			Automatic	2.54807				TRUE		TRUE			TRUE
96	H12	test	FAM	Unknown	Undetermined	73.6	Auto Tm							Automatic Ct		Automatic			Automatic	2.54807				TRUE		TRUE
86	H2	test	FAM	Unknown	24.559	87.4	Auto Tm							Automatic Ct		Automatic			Automatic	2.54807
87	H3	test	FAM	Unknown	24.7702	87.6	Auto Tm							Automatic Ct		Automatic			Automatic	2.54807
88	H4	test	FAM	Unknown	27.9953	87.8	Auto Tm							Automatic Ct		Automatic			Automatic	2.54807
89	H5	test	FAM	Unknown	28.0924	88	Auto Tm							Automatic Ct		Automatic			Automatic	2.54807
90	H6	test	FAM	Unknown	28.7243	88.1	Auto Tm							Automatic Ct		Automatic			Automatic	2.54807
91	H7	test	FAM	Unknown	28.3233	88.3	Auto Tm							Automatic Ct		Automatic			Automatic	2.54807
92	H8	test	FAM	Unknown	28.7027	88.1	Auto Tm							Automatic Ct		Automatic			Automatic	2.54807
93	H9	test	FAM	Unknown	28.4223	87.9	Auto Tm							Automatic Ct		Automatic			Automatic	2.54807
Slope		cycles/log decade
Y-Intercept
R^2
NAP	LPL
