# Supplementary material for: Suppressing circ_0008494 inhibits HSC s activation by regulating the miR-185-3p/ Col1a1 axis
Source: Research Square preprint supplement (doi:10.21203/rs.3.rs-1424258/v1), 2022-03-29
Supplement: Supplementary file 2 [file 29c8bf60ec22f9c51da54c1d.xlsx]

## Sheet: Sheet1
gene	group	Replicate #	Threshold Cycle (Ct)	Ct Mean	Ct Std. Dev		gene	group	Replicate #	Threshold Cycle (Ct)	Ct Mean	Ct Std. Dev		ΔCt	STDDEV		ΔΔCT (Target-Aveg Control)	2^-ΔΔCt		Low	HIGH	Error-	Error+
circ-0008494	input	1	23.4045				GAPDH	input	1	10.1309
circ-0008494	input	2	23.8225				GAPDH	input	2	9.97976
circ-0008494	input	3	23.2389	23.4886	0.30075		GAPDH	input	3		10.0554	0.106903		13.4333	0.319185		0	1		0.801523	1.24763	0.198477	0.247625
circ-0008494	185 probe	1	24.7163				GAPDH	185 probe	1	10.7771
circ-0008494	185 probe	2	24.9684				GAPDH	185 probe	2	11.2222
circ-0008494	185 probe	3	24.5478	24.7442	0.211695		GAPDH	185 probe	3	11.2897	11.0963	0.278562		13.6478	0.349874		0.214579	0.861798		0.676212	1.09832	0.185586	0.23652
circ-0008494	NC probe	1	26.1058				GAPDH	NC probe	1	11.1795
circ-0008494	NC probe	2	26.2606				GAPDH	NC probe	2	10.589
circ-0008494	NC probe	3	26.6925	26.353	0.304046		GAPDH	NC probe	3	11.069	10.9459	0.313907		15.4071	0.437015		1.97383	0.254576		0.188045	0.344644	0.0665304	0.0900688
Statistical analysis:t tests	T-Test：
p value 185 probe vs NC probe		0.0087

## Sheet: ct
SDS 2.4	AQ Results	1
Filename	202201018
PlateID
Assay Type	Absolute Quantification
Run DateTime	2022-01-18 16:02:07
Operator
ThermalCycleParams
Sample Information
Well	Sample Name	Detector Name	Reporter	Task	Ct	Tm Value	Tm Type	Quantity	Qty Mean	Qty StdDev	Ct Median	Ct Mean	Ct StdDev	Ct Type	Template Name	Baseline Type	Baseline Start	Baseline Stop	Threshold Type	Threshold	FOS	HMD	LME	EW	BPR	NAW	HNS	HRN	EAF	BAF	TAF	CAF
1	A1	test	FAM	Unknown	Undetermined	86.9	Auto Tm							Automatic Ct		Automatic			Automatic	0.140145
10	A10	test	FAM	Unknown	19.852	86.2	Auto Tm							Automatic Ct		Automatic			Automatic	0.140145
11	A11	test	FAM	Unknown	20.1234	86	Auto Tm							Automatic Ct		Automatic			Automatic	0.140145
12	A12	test	FAM	Unknown	20.4316	85.8	Auto Tm							Automatic Ct		Automatic			Automatic	0.140145
2	A2	test	FAM	Unknown	9.34376	87	Auto Tm							Automatic Ct		Automatic			Automatic	0.140145
3	A3	test	FAM	Unknown	9.51993	87	Auto Tm							Automatic Ct		Automatic			Automatic	0.140145
4	A4	test	FAM	Unknown	17.2276	83.9	Auto Tm							Automatic Ct		Automatic			Automatic	0.140145
5	A5	test	FAM	Unknown	17.3883	84.1	Auto Tm							Automatic Ct		Automatic			Automatic	0.140145
6	A6	test	FAM	Unknown	17.7	84.7	Auto Tm							Automatic Ct		Automatic			Automatic	0.140145
7	A7	test	FAM	Unknown	23.5691	88.7	Auto Tm							Automatic Ct		Automatic			Automatic	0.140145
8	A8	test	FAM	Unknown	24.4709	88.3	Auto Tm							Automatic Ct		Automatic			Automatic	0.140145
9	A9	test	FAM	Unknown	23.7395	87.9	Auto Tm							Automatic Ct		Automatic			Automatic	0.140145
13	B1	test	FAM	Unknown	12.5471	87.1	Auto Tm							Automatic Ct		Automatic			Automatic	0.140145
22	B10	test	FAM	Unknown	22.3015	86.6	Auto Tm							Automatic Ct		Automatic			Automatic	0.140145
23	B11	test	FAM	Unknown	21.6598	86.1	Auto Tm							Automatic Ct		Automatic			Automatic	0.140145
24	B12	test	FAM	Unknown	22.6604	85.9	Auto Tm							Automatic Ct		Automatic			Automatic	0.140145
14	B2	test	FAM	Unknown	13.7909	87.2	Auto Tm							Automatic Ct		Automatic			Automatic	0.140145
15	B3	test	FAM	Unknown	13.9089	87.6	Auto Tm							Automatic Ct		Automatic			Automatic	0.140145
16	B4	test	FAM	Unknown	16.0677	84.3	Auto Tm							Automatic Ct		Automatic			Automatic	0.140145
17	B5	test	FAM	Unknown	16.4087	84.7	Auto Tm							Automatic Ct		Automatic			Automatic	0.140145
18	B6	test	FAM	Unknown	16.9376	84.9	Auto Tm							Automatic Ct		Automatic			Automatic	0.140145
19	B7	test	FAM	Unknown	24.3887	89.1	Auto Tm							Automatic Ct		Automatic			Automatic	0.140145
20	B8	test	FAM	Unknown	24.0059	88.7	Auto Tm							Automatic Ct		Automatic			Automatic	0.140145
21	B9	test	FAM	Unknown	24.5146	88.3	Auto Tm							Automatic Ct		Automatic			Automatic	0.140145
25	C1	test	FAM	Unknown	13.5946	87.1	Auto Tm							Automatic Ct		Automatic			Automatic	0.140145
34	C10	test	FAM	Unknown	23.9835	86.8	Auto Tm							Automatic Ct		Automatic			Automatic	0.140145
35	C11	test	FAM	Unknown	24.7073	86.5	Auto Tm							Automatic Ct		Automatic			Automatic	0.140145
36	C12	test	FAM	Unknown	23.7754	85.9	Auto Tm							Automatic Ct		Automatic			Automatic	0.140145
26	C2	test	FAM	Unknown	13.21	87.4	Auto Tm							Automatic Ct		Automatic			Automatic	0.140145
27	C3	test	FAM	Unknown	13.1499	88	Auto Tm							Automatic Ct		Automatic			Automatic	0.140145
28	C4	test	FAM	Unknown	20.7942	84.9	Auto Tm							Automatic Ct		Automatic			Automatic	0.140145
29	C5	test	FAM	Unknown	19.8655	84.9	Auto Tm							Automatic Ct		Automatic			Automatic	0.140145
30	C6	test	FAM	Unknown	21.5735	85.1	Auto Tm							Automatic Ct		Automatic			Automatic	0.140145
31	C7	test	FAM	Unknown	30.8603	88.7	Auto Tm							Automatic Ct		Automatic			Automatic	0.140145
32	C8	test	FAM	Unknown	29.7445	88.5	Auto Tm							Automatic Ct		Automatic			Automatic	0.140145
33	C9	test	FAM	Unknown	29.4297	88.3	Auto Tm							Automatic Ct		Automatic			Automatic	0.140145
37	D1	test	FAM	Unknown	18.6208	87.5	Auto Tm							Automatic Ct		Automatic			Automatic	0.140145
46	D10	test	FAM	Unknown	26.1779	87.5	Auto Tm							Automatic Ct		Automatic			Automatic	0.140145
47	D11	test	FAM	Unknown	25.8808	86.9	Auto Tm							Automatic Ct		Automatic			Automatic	0.140145
48	D12	test	FAM	Unknown	26.2816	86.5	Auto Tm							Automatic Ct		Automatic			Automatic	0.140145
38	D2	test	FAM	Unknown	18.9354	88.4	Auto Tm							Automatic Ct		Automatic			Automatic	0.140145
39	D3	test	FAM	Unknown	18.5117	88.9	Auto Tm							Automatic Ct		Automatic			Automatic	0.140145
40	D4	test	FAM	Unknown	23.3957	85.7	Auto Tm							Automatic Ct		Automatic			Automatic	0.140145
41	D5	test	FAM	Unknown	22.8721	85.5	Auto Tm							Automatic Ct		Automatic			Automatic	0.140145
42	D6	test	FAM	Unknown	23.5865	85.5	Auto Tm							Automatic Ct		Automatic			Automatic	0.140145
43	D7	test	FAM	Unknown	Undetermined	63.8	Auto Tm							Automatic Ct		Automatic			Automatic	0.140145				TRUE		TRUE			TRUE
44	D8	test	FAM	Unknown	30.0328	88.9	Auto Tm							Automatic Ct		Automatic			Automatic	0.140145
45	D9	test	FAM	Unknown	30.7955	88.7	Auto Tm							Automatic Ct		Automatic			Automatic	0.140145
49	E1	test	FAM	Unknown	11.1209	87.5	Auto Tm							Automatic Ct		Automatic			Automatic	0.140145
58	E10	test	FAM	Unknown	34.6271	84.8	Auto Tm							Automatic Ct		Automatic			Automatic	0.140145
59	E11	test	FAM	Unknown	37.2795	83.5	Auto Tm							Automatic Ct		Automatic			Automatic	0.140145				TRUE
60	E12	test	FAM	Unknown	37.0135	82.7	Auto Tm							Automatic Ct		Automatic			Automatic	0.140145				TRUE
50	E2	test	FAM	Unknown	10.6949	88.2	Auto Tm							Automatic Ct		Automatic			Automatic	0.140145
51	E3	test	FAM	Unknown	6.89153	88.8	Auto Tm							Automatic Ct		Automatic			Automatic	0.140145
52	E4	test	FAM	Unknown	14.7122	90.5	Auto Tm							Automatic Ct		Automatic			Automatic	0.140145
53	E5	test	FAM	Unknown	13.5485	90.3	Auto Tm							Automatic Ct		Automatic			Automatic	0.140145
54	E6	test	FAM	Unknown	13.193	90.3	Auto Tm							Automatic Ct		Automatic			Automatic	0.140145
55	E7	test	FAM	Unknown	27.5811	89.3	Auto Tm							Automatic Ct		Automatic			Automatic	0.140145
56	E8	test	FAM	Unknown	25.6845	88.9	Auto Tm							Automatic Ct		Automatic			Automatic	0.140145
57	E9	test	FAM	Unknown	26.5122	88.7	Auto Tm							Automatic Ct		Automatic			Automatic	0.140145
61	F1	test	FAM	Unknown	11.7118	87.1	Auto Tm							Automatic Ct		Automatic			Automatic	0.140145
70	F10	test	FAM	Unknown	Undetermined	62	Auto Tm							Automatic Ct		Automatic			Automatic	0.140145				TRUE		TRUE
71	F11	test	FAM	Unknown	Undetermined	68.3	Auto Tm							Automatic Ct		Automatic			Automatic	0.140145				TRUE		TRUE			TRUE
72	F12	test	FAM	Unknown	Undetermined	63.9	Auto Tm							Automatic Ct		Automatic			Automatic	0.140145				TRUE		TRUE			TRUE
62	F2	test	FAM	Unknown	10.1309	87.4	Auto Tm							Automatic Ct		Automatic			Automatic	0.140145
63	F3	test	FAM	Unknown	9.97976	87.8	Auto Tm							Automatic Ct		Automatic			Automatic	0.140145							TRUE
64	F4	test	FAM	Unknown	12.7811	89.5	Auto Tm							Automatic Ct		Automatic			Automatic	0.140145
65	F5	test	FAM	Unknown	13.0756	89.7	Auto Tm							Automatic Ct		Automatic			Automatic	0.140145
66	F6	test	FAM	Unknown	12.8768	89.7	Auto Tm							Automatic Ct		Automatic			Automatic	0.140145
67	F7	test	FAM	Unknown	23.4045	88.9	Auto Tm							Automatic Ct		Automatic			Automatic	0.140145
68	F8	test	FAM	Unknown	23.8225	88.5	Auto Tm							Automatic Ct		Automatic			Automatic	0.140145
69	F9	test	FAM	Unknown	23.2389	88.3	Auto Tm							Automatic Ct		Automatic			Automatic	0.140145
73	G1	test	FAM	Unknown	10.7771	86.6	Auto Tm							Automatic Ct		Automatic			Automatic	0.140145
82	G10	test	FAM	Unknown	Undetermined	61.3	Auto Tm							Automatic Ct		Automatic			Automatic	0.140145				TRUE		TRUE			TRUE
83	G11	test	FAM	Unknown	Undetermined	67.1	Auto Tm							Automatic Ct		Automatic			Automatic	0.140145				TRUE		TRUE
84	G12	test	FAM	Unknown	Undetermined	73	Auto Tm							Automatic Ct		Automatic			Automatic	0.140145				TRUE		TRUE			TRUE
74	G2	test	FAM	Unknown	11.2222	87	Auto Tm							Automatic Ct		Automatic			Automatic	0.140145
75	G3	test	FAM	Unknown	11.2897	87.2	Auto Tm							Automatic Ct		Automatic			Automatic	0.140145
76	G4	test	FAM	Unknown	12.8579	88.9	Auto Tm							Automatic Ct		Automatic			Automatic	0.140145
77	G5	test	FAM	Unknown	13.3113	89.1	Auto Tm							Automatic Ct		Automatic			Automatic	0.140145
78	G6	test	FAM	Unknown	14.1707	89.1	Auto Tm							Automatic Ct		Automatic			Automatic	0.140145
79	G7	test	FAM	Unknown	24.7163	88.3	Auto Tm							Automatic Ct		Automatic			Automatic	0.140145
80	G8	test	FAM	Unknown	24.9684	88.1	Auto Tm							Automatic Ct		Automatic			Automatic	0.140145
81	G9	test	FAM	Unknown	24.5478	87.9	Auto Tm							Automatic Ct		Automatic			Automatic	0.140145
85	H1	test	FAM	Unknown	11.1795	86.6	Auto Tm							Automatic Ct		Automatic			Automatic	0.140145
94	H10	test	FAM	Unknown	Undetermined	63.5	Auto Tm							Automatic Ct		Automatic			Automatic	0.140145				TRUE		TRUE
95	H11	test	FAM	Unknown	Undetermined	64.1	Auto Tm							Automatic Ct		Automatic			Automatic	0.140145				TRUE		TRUE			TRUE
96	H12	test	FAM	Unknown	Undetermined	75.4	Auto Tm							Automatic Ct		Automatic			Automatic	0.140145				TRUE		TRUE			TRUE
86	H2	test	FAM	Unknown	10.589	86.8	Auto Tm							Automatic Ct		Automatic			Automatic	0.140145
87	H3	test	FAM	Unknown	11.069	86.8	Auto Tm							Automatic Ct		Automatic			Automatic	0.140145
88	H4	test	FAM	Unknown	14.3701	88.6	Auto Tm							Automatic Ct		Automatic			Automatic	0.140145
89	H5	test	FAM	Unknown	15.1913	88.7	Auto Tm							Automatic Ct		Automatic			Automatic	0.140145
90	H6	test	FAM	Unknown	15.3402	88.9	Auto Tm							Automatic Ct		Automatic			Automatic	0.140145
91	H7	test	FAM	Unknown	26.1058	88.1	Auto Tm							Automatic Ct		Automatic			Automatic	0.140145
92	H8	test	FAM	Unknown	26.2606	87.9	Auto Tm							Automatic Ct		Automatic			Automatic	0.140145
93	H9	test	FAM	Unknown	26.6925	87.7	Auto Tm							Automatic Ct		Automatic			Automatic	0.140145
Slope		cycles/log decade
Y-Intercept
R^2
NAP	LPL
