# Supplementary material for: Suppressing circ_0008494 inhibits HSC s activation by regulating the miR-185-3p/ Col1a1 axis
Source: Research Square preprint supplement (doi:10.21203/rs.3.rs-1424258/v1), 2022-03-29
Supplement: Supplementary file 3 [file 3be4decf2fecc2933c25b8c5.xlsx]

## Sheet: sheet1
gene	group	Replicate #	Threshold Cycle (Ct)	Ct Mean	Ct Std. Dev		gene	group	Replicate #	Threshold Cycle (Ct)	Ct Mean	Ct Std. Dev		ΔCt	STDDEV		ΔΔCT (Target-Aveg Control)	2^-ΔΔCt		Low	HIGH	Error-	Error+
α-SMA	LV-NC+inhibitorNC	1	19.446				GAPDH	LV-NC+inhibitorNC	1	12.3582
α-SMA	LV-NC+inhibitorNC	2	19.36				GAPDH	LV-NC+inhibitorNC	2	12.346
α-SMA	LV-NC+inhibitorNC	3	19.1807	19.3289	0.135338		GAPDH	LV-NC+inhibitorNC	3	12.2424	12.3155	0.0636257		7.01338	0.149548		0	1		0.901533	1.10922	0.0984674	0.109222
α-SMA	KD+miR-185 inhibitor	1	20.1349				GAPDH	KD+miR-185 inhibitor	1	12.6477
α-SMA	KD+miR-185 inhibitor	2	20.115				GAPDH	KD+miR-185 inhibitor	2	12.66
α-SMA	KD+miR-185 inhibitor	3	20.1285	20.1261	0.0101738		GAPDH	KD+miR-185 inhibitor	3	12.6349	12.6475	0.0125741		7.47859	0.0161745		0.465207	0.724367		0.716291	0.732534	0.00807574	0.00816678
α-SMA	LV-NC+inhibitorNC	1	18.7489				GAPDH	LV-NC+inhibitorNC	1	12.8843
α-SMA	LV-NC+inhibitorNC	2	18.8162				GAPDH	LV-NC+inhibitorNC	2	12.5669
α-SMA	LV-NC+inhibitorNC	3	18.7924	18.7858	0.0341264		GAPDH	LV-NC+inhibitorNC	3		12.7256	0.482575		6.06018	0.48378		0	1		0.715101	1.3984	0.284899	0.398403
α-SMA	LV-KD+inhibitorNC	1	19.053				GAPDH	LV-KD+inhibitorNC	1	11.8845
α-SMA	LV-KD+inhibitorNC	2	19.3105				GAPDH	LV-KD+inhibitorNC	2
α-SMA	LV-KD+inhibitorNC	3	19.1383	19.1673	0.131167		GAPDH	LV-KD+inhibitorNC	3	11.8759	11.8802	0.00603728		7.28708	0.131306		1.2269	0.427234		0.390067	0.467943	0.0371674	0.0407089
Col1a1	LV-NC+inhibitorNC	1	16.1928				GAPDH	LV-NC+inhibitorNC	1	12.3582
Col1a1	LV-NC+inhibitorNC	2	16.2837				GAPDH	LV-NC+inhibitorNC	2	12.346
Col1a1	LV-NC+inhibitorNC	3	15.9385	16.1383	0.178952		GAPDH	LV-NC+inhibitorNC	3	12.2424	12.3155	0.0636257		3.82281	0.189926		0	1		0.876651	1.14071	0.123349	0.140705
Col1a1	KD+miR-185 inhibitor	1	16.9588				GAPDH	KD+miR-185 inhibitor	1	12.6477
Col1a1	KD+miR-185 inhibitor	2	16.8121				GAPDH	KD+miR-185 inhibitor	2	12.66
Col1a1	KD+miR-185 inhibitor	3	16.9248	16.8986	0.0767939		GAPDH	KD+miR-185 inhibitor	3	12.6349	12.6475	0.0125741		4.25106	0.0778165		0.42825	0.743163		0.70414	0.784349	0.039023	0.0411857
Col1a1	LV-NC+inhibitorNC	1	24.2482				GAPDH	LV-NC+inhibitorNC	1	12.8843
Col1a1	LV-NC+inhibitorNC	2	24.2184				GAPDH	LV-NC+inhibitorNC	2	12.5669
Col1a1	LV-NC+inhibitorNC	3	24.3021	24.2562	0.0424121		GAPDH	LV-NC+inhibitorNC	3		12.7256	0.0330028		11.5306	0.0537398		0	1		0.963436	1.03795	0.0365644	0.0379521
Col1a1	LV-KD+inhibitorNC	1	26.4823				GAPDH	LV-KD+inhibitorNC	1	12.6136
Col1a1	LV-KD+inhibitorNC	2	26.4134				GAPDH	LV-KD+inhibitorNC	2	12.7833
Col1a1	LV-KD+inhibitorNC	3	26.557	26.4843	0.0718237		GAPDH	LV-KD+inhibitorNC	3	12.6639	12.6869	0.0871607		13.7973	0.112941		2.26672	0.207802		0.192155	0.224724	0.0156473	0.0169214
Statistical analysis:t tests	T-Test：
	α-SMA
p value(miR185in +LV-KD vs inhibitor NC+LV-NC)	0.0009
p value(miR185in +LV-KD vs inhibitor NC+LV-KD )	0.0002
	Col1a1
p value(miR185in +LV-KD vs inhibitor NC+LV-NC)	0.0005
p value(miR185in +LV-KD vs inhibitor NC+LV-KD )	<0.0001

## Sheet: CT
SDS 2.4	AQ Results	1
Filename	2021-10-29-2
PlateID
Assay Type	Absolute Quantification
Run DateTime	2021-10-29 13:16:00
Operator
ThermalCycleParams
Sample Information
Well	Sample Name	Detector Name	Reporter	Task	Ct	Tm Value	Tm Type	Quantity	Qty Mean	Qty StdDev	Ct Median	Ct Mean	Ct StdDev	Ct Type	Template Name	Baseline Type	Baseline Start	Baseline Stop	Threshold Type	Threshold	FOS	HMD	LME	EW	BPR	NAW	HNS	HRN	EAF	BAF	TAF	CAF
1	A1	test	FAM	Unknown	12.6477	86.8	Auto Tm							Manual Ct		Automatic			Manual	1
10	A10	test	FAM	Unknown	25.8757	87.5	Auto Tm							Manual Ct		Automatic			Manual	1
11	A11	test	FAM	Unknown	25.9582	87.2	Auto Tm							Manual Ct		Automatic			Manual	1
12	A12	test	FAM	Unknown	25.9452	87.2	Auto Tm							Manual Ct		Automatic			Manual	1
2	A2	test	FAM	Unknown	12.66	87	Auto Tm							Manual Ct		Automatic			Manual	1
3	A3	test	FAM	Unknown	12.6349	87.2	Auto Tm							Manual Ct		Automatic			Manual	1
4	A4	test	FAM	Unknown	20.1349	86	Auto Tm							Manual Ct		Automatic			Manual	1
5	A5	test	FAM	Unknown	20.115	86.4	Auto Tm							Manual Ct		Automatic			Manual	1
6	A6	test	FAM	Unknown	20.1285	86.7	Auto Tm							Manual Ct		Automatic			Manual	1
7	A7	test	FAM	Unknown	16.9588	89.4	Auto Tm							Manual Ct		Automatic			Manual	1
8	A8	test	FAM	Unknown	16.8121	89	Auto Tm							Manual Ct		Automatic			Manual	1
9	A9	test	FAM	Unknown	16.9248	88.6	Auto Tm							Manual Ct		Automatic			Manual	1
13	B1	test	FAM	Unknown	12.5372	86.8	Auto Tm							Manual Ct		Automatic			Manual	1
22	B10	test	FAM	Unknown	26.5657	87.7	Auto Tm							Manual Ct		Automatic			Manual	1
23	B11	test	FAM	Unknown	26.495	87.4	Auto Tm							Manual Ct		Automatic			Manual	1
24	B12	test	FAM	Unknown	26.5558	87.2	Auto Tm							Manual Ct		Automatic			Manual	1
14	B2	test	FAM	Unknown	12.6125	87	Auto Tm							Manual Ct		Automatic			Manual	1
15	B3	test	FAM	Unknown	12.5068	87.4	Auto Tm							Manual Ct		Automatic			Manual	1
16	B4	test	FAM	Unknown	20.6019	86.4	Auto Tm							Manual Ct		Automatic			Manual	1
17	B5	test	FAM	Unknown	20.5186	86.6	Auto Tm							Manual Ct		Automatic			Manual	1
18	B6	test	FAM	Unknown	20.502	86.9	Auto Tm							Manual Ct		Automatic			Manual	1
19	B7	test	FAM	Unknown	17.0339	89.6	Auto Tm							Manual Ct		Automatic			Manual	1
20	B8	test	FAM	Unknown	16.8571	89.2	Auto Tm							Manual Ct		Automatic			Manual	1
21	B9	test	FAM	Unknown	16.7281	88.8	Auto Tm							Manual Ct		Automatic			Manual	1
25	C1	test	FAM	Unknown	12.3582	87	Auto Tm							Manual Ct		Automatic			Manual	1
34	C10	test	FAM	Unknown	24.0693	88	Auto Tm							Manual Ct		Automatic			Manual	1
35	C11	test	FAM	Unknown	23.8995	87.8	Auto Tm							Manual Ct		Automatic			Manual	1
36	C12	test	FAM	Unknown	24.1244	87.4	Auto Tm							Manual Ct		Automatic			Manual	1
26	C2	test	FAM	Unknown	12.346	87.5	Auto Tm							Manual Ct		Automatic			Manual	1
27	C3	test	FAM	Unknown	12.2424	88	Auto Tm							Manual Ct		Automatic			Manual	1
28	C4	test	FAM	Unknown	19.446	87	Auto Tm							Manual Ct		Automatic			Manual	1
29	C5	test	FAM	Unknown	19.36	87	Auto Tm							Manual Ct		Automatic			Manual	1
30	C6	test	FAM	Unknown	19.1807	87.1	Auto Tm							Manual Ct		Automatic			Manual	1
31	C7	test	FAM	Unknown	16.1928	89.8	Auto Tm							Manual Ct		Automatic			Manual	1
32	C8	test	FAM	Unknown	16.2837	89.4	Auto Tm							Manual Ct		Automatic			Manual	1
33	C9	test	FAM	Unknown	15.9385	89	Auto Tm							Manual Ct		Automatic			Manual	1
37	D1	test	FAM	Unknown	11.8845	87.4	Auto Tm							Manual Ct		Automatic			Manual	1
46	D10	test	FAM	Unknown	26.9085	88.8	Auto Tm							Manual Ct		Automatic			Manual	1
47	D11	test	FAM	Unknown	26.8655	88.2	Auto Tm							Manual Ct		Automatic			Manual	1
48	D12	test	FAM	Unknown	26.8846	87.8	Auto Tm							Manual Ct		Automatic			Manual	1
38	D2	test	FAM	Unknown	12.3617	88.1	Auto Tm							Manual Ct		Automatic			Manual	1
39	D3	test	FAM	Unknown	11.8759	88.9	Auto Tm							Manual Ct		Automatic			Manual	1
40	D4	test	FAM	Unknown	19.053	83.7	Auto Tm							Manual Ct		Automatic			Manual	1
41	D5	test	FAM	Unknown	19.3105	83.3	Auto Tm							Manual Ct		Automatic			Manual	1
42	D6	test	FAM	Unknown	19.1383	83.3	Auto Tm							Manual Ct		Automatic			Manual	1
43	D7	test	FAM	Unknown	18.8513	86.9	Auto Tm							Manual Ct		Automatic			Manual	1
44	D8	test	FAM	Unknown	18.7894	86.5	Auto Tm							Manual Ct		Automatic			Manual	1
45	D9	test	FAM	Unknown	18.8509	86.3	Auto Tm							Manual Ct		Automatic			Manual	1
49	E1	test	FAM	Unknown	12.6136	87.4	Auto Tm							Manual Ct		Automatic			Manual	1
58	E10	test	FAM	Unknown	26.4823	88.6	Auto Tm							Manual Ct		Automatic			Manual	1
59	E11	test	FAM	Unknown	26.4134	88.2	Auto Tm							Manual Ct		Automatic			Manual	1
60	E12	test	FAM	Unknown	26.557	87.8	Auto Tm							Manual Ct		Automatic			Manual	1
50	E2	test	FAM	Unknown	12.7833	88.1	Auto Tm							Manual Ct		Automatic			Manual	1
51	E3	test	FAM	Unknown	12.6639	88.7	Auto Tm							Manual Ct		Automatic			Manual	1
52	E4	test	FAM	Unknown	19.3247	83.5	Auto Tm							Manual Ct		Automatic			Manual	1
53	E5	test	FAM	Unknown	19.1447	83.3	Auto Tm							Manual Ct		Automatic			Manual	1
54	E6	test	FAM	Unknown	19.241	83.3	Auto Tm							Manual Ct		Automatic			Manual	1
55	E7	test	FAM	Unknown	18.9774	86.9	Auto Tm							Manual Ct		Automatic			Manual	1
56	E8	test	FAM	Unknown	18.8898	86.5	Auto Tm							Manual Ct		Automatic			Manual	1
57	E9	test	FAM	Unknown	18.8147	86.5	Auto Tm							Manual Ct		Automatic			Manual	1
61	F1	test	FAM	Unknown	12.8843	87	Auto Tm							Manual Ct		Automatic			Manual	1
70	F10	test	FAM	Unknown	24.2482	88.2	Auto Tm							Manual Ct		Automatic			Manual	1
71	F11	test	FAM	Unknown	24.2184	87.8	Auto Tm							Manual Ct		Automatic			Manual	1
72	F12	test	FAM	Unknown	24.3021	87.6	Auto Tm							Manual Ct		Automatic			Manual	1
62	F2	test	FAM	Unknown	12.5669	87.4	Auto Tm							Manual Ct		Automatic			Manual	1
63	F3	test	FAM	Unknown	11.7321	87.7	Auto Tm							Manual Ct		Automatic			Manual	1
64	F4	test	FAM	Unknown	18.7489	82.7	Auto Tm							Manual Ct		Automatic			Manual	1
65	F5	test	FAM	Unknown	18.8162	82.7	Auto Tm							Manual Ct		Automatic			Manual	1
66	F6	test	FAM	Unknown	18.7924	82.9	Auto Tm							Manual Ct		Automatic			Manual	1
67	F7	test	FAM	Unknown	18.5196	86.7	Auto Tm							Manual Ct		Automatic			Manual	1
68	F8	test	FAM	Unknown	18.5286	86.3	Auto Tm							Manual Ct		Automatic			Manual	1
69	F9	test	FAM	Unknown	18.6125	86.1	Auto Tm							Manual Ct		Automatic			Manual	1
73	G1	test	FAM	Unknown	Undetermined	92	Auto Tm							Manual Ct		Automatic			Manual	1				TRUE		TRUE
82	G10	test	FAM	Unknown	Undetermined	89	Auto Tm							Manual Ct		Automatic			Manual	1				TRUE		TRUE			TRUE
83	G11	test	FAM	Unknown	Undetermined	81.5	Auto Tm							Manual Ct		Automatic			Manual	1				TRUE		TRUE
84	G12	test	FAM	Unknown	Undetermined	81.1	Auto Tm							Manual Ct		Automatic			Manual	1				TRUE		TRUE			TRUE
74	G2	test	FAM	Unknown	Undetermined	64.1	Auto Tm							Manual Ct		Automatic			Manual	1				TRUE		TRUE
75	G3	test	FAM	Unknown	Undetermined	74.5	Auto Tm							Manual Ct		Automatic			Manual	1				TRUE		TRUE			TRUE
76	G4	test	FAM	Unknown	Undetermined	70.7	Auto Tm							Manual Ct		Automatic			Manual	1				TRUE		TRUE			TRUE
77	G5	test	FAM	Unknown	Undetermined	67.7	Auto Tm							Manual Ct		Automatic			Manual	1				TRUE		TRUE
78	G6	test	FAM	Unknown	Undetermined	83.3	Auto Tm							Manual Ct		Automatic			Manual	1				TRUE		TRUE			TRUE
79	G7	test	FAM	Unknown	Undetermined	78.5	Auto Tm							Manual Ct		Automatic			Manual	1				TRUE		TRUE			TRUE
80	G8	test	FAM	Unknown	Undetermined	71.8	Auto Tm							Manual Ct		Automatic			Manual	1				TRUE		TRUE			TRUE
81	G9	test	FAM	Unknown	Undetermined	86.9	Auto Tm							Manual Ct		Automatic			Manual	1				TRUE		TRUE			TRUE
85	H1	test	FAM	Unknown	Undetermined	62.8	Auto Tm							Manual Ct		Automatic			Manual	1				TRUE		TRUE
94	H10	test	FAM	Unknown	Undetermined	90.4	Auto Tm							Manual Ct		Automatic			Manual	1				TRUE		TRUE			TRUE
95	H11	test	FAM	Unknown	Undetermined	62.5	Auto Tm							Manual Ct		Automatic			Manual	1				TRUE		TRUE			TRUE
96	H12	test	FAM	Unknown	Undetermined	62.5	Auto Tm							Manual Ct		Automatic			Manual	1				TRUE		TRUE			TRUE
86	H2	test	FAM	Unknown	Undetermined	79.3	Auto Tm							Manual Ct		Automatic			Manual	1				TRUE		TRUE			TRUE
87	H3	test	FAM	Unknown	Undetermined	75.7	Auto Tm							Manual Ct		Automatic			Manual	1				TRUE		TRUE			TRUE
88	H4	test	FAM	Unknown	Undetermined	83.7	Auto Tm							Manual Ct		Automatic			Manual	1				TRUE		TRUE			TRUE
89	H5	test	FAM	Unknown	Undetermined	70.5	Auto Tm							Manual Ct		Automatic			Manual	1				TRUE		TRUE			TRUE
90	H6	test	FAM	Unknown	Undetermined	90.6	Auto Tm							Manual Ct		Automatic			Manual	1				TRUE		TRUE			TRUE
91	H7	test	FAM	Unknown	Undetermined	79.4	Auto Tm							Manual Ct		Automatic			Manual	1				TRUE		TRUE
92	H8	test	FAM	Unknown	Undetermined	90.4	Auto Tm							Manual Ct		Automatic			Manual	1				TRUE		TRUE			TRUE
93	H9	test	FAM	Unknown	Undetermined	79.8	Auto Tm							Manual Ct		Automatic			Manual	1				TRUE		TRUE			TRUE
Slope		cycles/log decade
Y-Intercept
R^2
NAP	LPL
