# Supplementary material for: Suppressing circ_0008494 inhibits HSC s activation by regulating the miR-185-3p/ Col1a1 axis
Source: Research Square preprint supplement (doi:10.21203/rs.3.rs-1424258/v1), 2022-03-29
Supplement: Supplementary file 4 [file 8edbeca7690af90804d96133.xlsx]

## Sheet: sheet1
gene	group	Replicate #	Threshold Cycle (Ct)	Ct Mean	Ct Std. Dev		gene	GAPDH	Replicate #	Threshold Cycle (Ct)	Ct Mean	Ct Std. Dev		ΔCt	STDDEV		ΔΔCT (Target-Aveg Control)	2^-ΔΔCt		Low	HIGH	Error-	Error+
α-SMA	NC	1	17.0754				GAPDH	NC	1	13.5311
α-SMA	NC	2	17.0754				GAPDH	NC	2	13.5964
α-SMA	NC	3	16.5381	16.8963	0.310218		GAPDH	NC	3	13.1611	13.4296	0.234735		3.46677	0.389019		0	1		0.763649	1.3095	0.236351	0.309503
α-SMA	TGF	1	15.665				GAPDH	TGF	1	14.2382
α-SMA	TGF	2	15.988				GAPDH	TGF	2	14.3572
α-SMA	TGF	3	15.8265	15.8265	0.161529		GAPDH	TGF	3	14.2977	14.2977	0.05952		1.52879	0.172146		-1.93798	3.83168		3.4007	4.31728	0.430983	0.485603
COl1a1	NC	1	14.0901				GAPDH	NC	1	13.5311
COl1a1	NC	2	14.0901				GAPDH	NC	2	13.5964
COl1a1	NC	3	13.6863	13.9555	0.233141		GAPDH	NC	3	13.1611	13.4296	0.234735		0.525945	0.33084		0	1		0.795073	1.25775	0.204927	0.257746
COl1a1	TGF	1	13.1046				GAPDH	TGF	1	14.2382
COl1a1	TGF	2	13.1046				GAPDH	TGF	2	14.3572
COl1a1	TGF	3	13.1046	13.1046	0		GAPDH	TGF	3	14.2977	14.2977	0.05952		-1.19309	0.05952		-1.71903	3.29215		3.1591	3.43082	0.133058	0.138662
circ_0008494	NC	1	21.5838				GAPDH	NC	1	11.7454
circ_0008494	NC	2	21.2146				GAPDH	NC	2	11.6007
circ_0008494	NC	3	21.942	21.5801	0.363724		GAPDH	NC	3	12.4138	11.92	0.433738		9.66015	0.56606		0	1		0.675459	1.48047	0.324541	0.480474
circ_0008494	TGF	1	22.2838				GAPDH	TGF	1	13.8924
circ_0008494	TGF	2	22.3384				GAPDH	TGF	2	13.8924
circ_0008494	TGF	3	22.3644	22.3289	0.041125		GAPDH	TGF	3	13.9661	13.917	0.0425351		8.41191	0.0591651		-1.24824	2.37551		2.28006	2.47496	0.0954494	0.0994452
circ_0029332	NC	1	34.0215				GAPDH	NC	1	14.9045
circ_0029332	NC	2	34.0215				GAPDH	NC	2	14.8145
circ_0029332	NC	3	34.0766	34.0398	0.0318184		GAPDH	NC	3	14.777	14.832	0.0655382		19.2079	0.0728537		0	1		0.950755	1.0518	0.0492445	0.0517951
circ_0029332	TGF	1	32.3481				GAPDH	TGF	1	14.694
circ_0029332	TGF	2	32.3481				GAPDH	TGF	2	14.6967
circ_0029332	TGF	3	31.7564	32.1509	0.34165		GAPDH	TGF	3	14.7287	14.7065	0.0193016		17.4444	0.342195		-1.76347	3.39513		2.67821	4.30395	0.716914	0.90882
circ_0110534	NC	1	31.6256				GAPDH	NC	1	14.851
circ_0110534	NC	2	31.2311				GAPDH	NC	2	14.3653
circ_0110534	NC	3	31.6665	31.5077	0.240416		GAPDH	NC	3	14.3653	14.5272	0.280391		16.9805	0.36935		0	1		0.774131	1.29177	0.225869	0.29177
circ_0110534	TGF	1	30.5747				GAPDH	TGF	1	12.3896
circ_0110534	TGF	2	30.8692				GAPDH	TGF	2	12.6972
circ_0110534	TGF	3	31.4142	30.9527	0.425914		GAPDH	TGF	3	12.6972	12.5947	0.177622		18.358	0.461467		1.37753	0.384877		0.279516	0.529953	0.105361	0.145076
circ_0013617	NC	1	26.4285				GAPDH	NC	1	13.896
circ_0013617	NC	2	26.4285				GAPDH	NC	2	14.0923
circ_0013617	NC	3	26.6107	26.4893	0.105183		GAPDH	NC	3	14.1813	14.0565	0.145993		12.4327	0.179937		0	1		0.882741	1.13283	0.117259	0.132835
circ_0013617	TGF	1	23.7255				GAPDH	TGF	1	13.7266
circ_0013617	TGF	2	23.9243				GAPDH	TGF	2	13.7682
circ_0013617	TGF	3	23.6201	23.7567	0.154473		GAPDH	TGF	3	13.7674	13.7541	0.0237808		10.0026	0.156293		-2.43012	5.38939		4.83605	6.00604	0.553341	0.616655
Statistical analysis:t tests	T-Test：
p value(TGF vs Blank)	α-SMA	0.0008
	COl1a1	0.0001
	circ_0008494	0.0053
	circ_0029332	0.0064
	circ_0110534	0.0203
	circ_0013617	0.0002

## Sheet: CT COl1a1α-SMA
SDS 2.4	AQ Results	1
Filename	2019-08-06
PlateID
Assay Type	Absolute Quantification
Run DateTime	2019-08-06 17:30:49
Operator
ThermalCycleParams
Sample Information
Well	Sample Name	Detector Name	Reporter	Task	Ct	Tm Value	Tm Type	Quantity	Qty Mean	Qty StdDev	Ct Median	Ct Mean	Ct StdDev	Ct Type	Template Name	Baseline Type	Baseline Start	Baseline Stop	Threshold Type	Threshold	FOS	HMD	LME	EW	BPR	NAW	HNS	HRN	EAF	BAF	TAF	CAF
1	A1	test	FAM	Unknown	13.5311	85	Auto Tm							Automatic Ct		Automatic			Automatic	0.0186667
10	A10	test	FAM	Unknown	17.2247	86.4	Auto Tm							Automatic Ct		Automatic			Automatic	0.0186667
11	A11	test	FAM	Unknown	17.8464	86.4	Auto Tm							Automatic Ct		Automatic			Automatic	0.0186667
12	A12	test	FAM	Unknown	18.1105	86.2	Auto Tm							Automatic Ct		Automatic			Automatic	0.0186667
2	A2	test	FAM	Unknown	13.5964	85.1	Auto Tm							Automatic Ct		Automatic			Automatic	0.0186667
3	A3	test	FAM	Unknown	13.1611	85.1	Auto Tm							Automatic Ct		Automatic			Automatic	0.0186667
4	A4	test	FAM	Unknown	13.5626	86.7	Auto Tm							Automatic Ct		Automatic			Automatic	0.0186667
5	A5	test	FAM	Unknown	14.0901	86.8	Auto Tm							Automatic Ct		Automatic			Automatic	0.0186667
6	A6	test	FAM	Unknown	13.6863	87	Auto Tm							Automatic Ct		Automatic			Automatic	0.0186667
7	A7	test	FAM	Unknown	16.1397	86.6	Auto Tm							Automatic Ct		Automatic			Automatic	0.0186667
8	A8	test	FAM	Unknown	17.0754	86.4	Auto Tm							Automatic Ct		Automatic			Automatic	0.0186667
9	A9	test	FAM	Unknown	16.5381	86	Auto Tm							Automatic Ct		Automatic			Automatic	0.0186667
13	B1	test	FAM	Unknown	13.2454	85	Auto Tm							Automatic Ct		Automatic			Automatic	0.0186667
22	B10	test	FAM	Unknown	17.5339	86.8	Auto Tm							Automatic Ct		Automatic			Automatic	0.0186667
23	B11	test	FAM	Unknown	17.8973	86.6	Auto Tm							Automatic Ct		Automatic			Automatic	0.0186667
24	B12	test	FAM	Unknown	17.9325	86.3	Auto Tm							Automatic Ct		Automatic			Automatic	0.0186667
14	B2	test	FAM	Unknown	14.4347	85.1	Auto Tm							Automatic Ct		Automatic			Automatic	0.0186667
15	B3	test	FAM	Unknown	13.4202	85.1	Auto Tm							Automatic Ct		Automatic			Automatic	0.0186667
16	B4	test	FAM	Unknown	14.5165	86.8	Auto Tm							Automatic Ct		Automatic			Automatic	0.0186667
17	B5	test	FAM	Unknown	Undetermined	87	Auto Tm							Automatic Ct		Automatic			Automatic	0.0186667
18	B6	test	FAM	Unknown	13.6895	87.2	Auto Tm							Automatic Ct		Automatic			Automatic	0.0186667
19	B7	test	FAM	Unknown	14.3129	86.8	Auto Tm							Automatic Ct		Automatic			Automatic	0.0186667
20	B8	test	FAM	Unknown	16.0721	86.6	Auto Tm							Automatic Ct		Automatic			Automatic	0.0186667
21	B9	test	FAM	Unknown	16.1148	86.4	Auto Tm							Automatic Ct		Automatic			Automatic	0.0186667
25	C1	test	FAM	Unknown	13.7941	85.1	Auto Tm							Automatic Ct		Automatic			Automatic	0.0186667
34	C10	test	FAM	Unknown	18.1452	86.9	Auto Tm							Automatic Ct		Automatic			Automatic	0.0186667
35	C11	test	FAM	Unknown	18.1829	86.7	Auto Tm							Automatic Ct		Automatic			Automatic	0.0186667
36	C12	test	FAM	Unknown	18.1518	86.3	Auto Tm							Automatic Ct		Automatic			Automatic	0.0186667
26	C2	test	FAM	Unknown	13.1276	85.3	Auto Tm							Automatic Ct		Automatic			Automatic	0.0186667
27	C3	test	FAM	Unknown	13.4638	85.5	Auto Tm							Automatic Ct		Automatic			Automatic	0.0186667
28	C4	test	FAM	Unknown	13.8728	87.4	Auto Tm							Automatic Ct		Automatic			Automatic	0.0186667
29	C5	test	FAM	Unknown	13.6941	87.4	Auto Tm							Automatic Ct		Automatic			Automatic	0.0186667
30	C6	test	FAM	Unknown	12.5468	87.8	Auto Tm							Automatic Ct		Automatic			Automatic	0.0186667
31	C7	test	FAM	Unknown	15.9626	87.2	Auto Tm							Automatic Ct		Automatic			Automatic	0.0186667
32	C8	test	FAM	Unknown	16.6051	87	Auto Tm							Automatic Ct		Automatic			Automatic	0.0186667
33	C9	test	FAM	Unknown	18.2415	86.6	Auto Tm							Automatic Ct		Automatic			Automatic	0.0186667
37	D1	test	FAM	Unknown	13.4837	85.1	Auto Tm							Automatic Ct		Automatic			Automatic	0.0186667
46	D10	test	FAM	Unknown	17.2828	87.3	Auto Tm							Automatic Ct		Automatic			Automatic	0.0186667
47	D11	test	FAM	Unknown	17.5418	86.9	Auto Tm							Automatic Ct		Automatic			Automatic	0.0186667
48	D12	test	FAM	Unknown	18.4221	86.7	Auto Tm							Automatic Ct		Automatic			Automatic	0.0186667
38	D2	test	FAM	Unknown	13.0443	85.5	Auto Tm							Automatic Ct		Automatic			Automatic	0.0186667
39	D3	test	FAM	Unknown	12.9389	85.9	Auto Tm							Automatic Ct		Automatic			Automatic	0.0186667
40	D4	test	FAM	Unknown	13.8327	87.8	Auto Tm							Automatic Ct		Automatic			Automatic	0.0186667
41	D5	test	FAM	Unknown	13.2482	88	Auto Tm							Automatic Ct		Automatic			Automatic	0.0186667
42	D6	test	FAM	Unknown	13.8637	88.1	Auto Tm							Automatic Ct		Automatic			Automatic	0.0186667
43	D7	test	FAM	Unknown	15.2833	87.6	Auto Tm							Automatic Ct		Automatic			Automatic	0.0186667
44	D8	test	FAM	Unknown	15.8739	87.3	Auto Tm							Automatic Ct		Automatic			Automatic	0.0186667
45	D9	test	FAM	Unknown	16.8562	87.1	Auto Tm							Automatic Ct		Automatic			Automatic	0.0186667
49	E1	test	FAM	Unknown	14.2382	85.3	Auto Tm							Automatic Ct		Automatic			Automatic	0.0186667
58	E10	test	FAM	Unknown	18.8072	87.3	Auto Tm							Automatic Ct		Automatic			Automatic	0.0186667
59	E11	test	FAM	Unknown	18.1761	86.9	Auto Tm							Automatic Ct		Automatic			Automatic	0.0186667
60	E12	test	FAM	Unknown	18.0222	86.7	Auto Tm							Automatic Ct		Automatic			Automatic	0.0186667
50	E2	test	FAM	Unknown	14.3572	85.5	Auto Tm							Automatic Ct		Automatic			Automatic	0.0186667
51	E3	test	FAM	Unknown	12.9022	86.1	Auto Tm							Automatic Ct		Automatic			Automatic	0.0186667
52	E4	test	FAM	Unknown	Undetermined	88	Auto Tm							Automatic Ct		Automatic			Automatic	0.0186667
53	E5	test	FAM	Unknown	13.1046	88.2	Auto Tm							Automatic Ct		Automatic			Automatic	0.0186667
54	E6	test	FAM	Unknown	Undetermined	88.3	Auto Tm							Automatic Ct		Automatic			Automatic	0.0186667
55	E7	test	FAM	Unknown	15.665	87.8	Auto Tm							Automatic Ct		Automatic			Automatic	0.0186667
56	E8	test	FAM	Unknown	15.988	87.6	Auto Tm							Automatic Ct		Automatic			Automatic	0.0186667
57	E9	test	FAM	Unknown	17.4435	87.1	Auto Tm							Automatic Ct		Automatic			Automatic	0.0186667
61	F1	test	FAM	Unknown	13.4428	85.3	Auto Tm							Automatic Ct		Automatic			Automatic	0.0186667
70	F10	test	FAM	Unknown	18.2532	87.1	Auto Tm							Automatic Ct		Automatic			Automatic	0.0186667
71	F11	test	FAM	Unknown	18.1052	86.9	Auto Tm							Automatic Ct		Automatic			Automatic	0.0186667
72	F12	test	FAM	Unknown	18.5389	86.7	Auto Tm							Automatic Ct		Automatic			Automatic	0.0186667
62	F2	test	FAM	Unknown	13.5738	85.5	Auto Tm							Automatic Ct		Automatic			Automatic	0.0186667
63	F3	test	FAM	Unknown	13.7186	85.7	Auto Tm							Automatic Ct		Automatic			Automatic	0.0186667
64	F4	test	FAM	Unknown	12.6626	87.6	Auto Tm							Automatic Ct		Automatic			Automatic	0.0186667
65	F5	test	FAM	Unknown	12.3925	87.8	Auto Tm							Automatic Ct		Automatic			Automatic	0.0186667
66	F6	test	FAM	Unknown	12.4593	88.1	Auto Tm							Automatic Ct		Automatic			Automatic	0.0186667
67	F7	test	FAM	Unknown	16.5222	87.6	Auto Tm							Automatic Ct		Automatic			Automatic	0.0186667
68	F8	test	FAM	Unknown	16.2196	87.3	Auto Tm							Automatic Ct		Automatic			Automatic	0.0186667
69	F9	test	FAM	Unknown	15.9095	87	Auto Tm							Automatic Ct		Automatic			Automatic	0.0186667
73	G1	test	FAM	Unknown	Undetermined	77.1	Auto Tm							Automatic Ct		Automatic			Automatic	0.0186667				TRUE		TRUE			TRUE
82	G10	test	FAM	Unknown	Undetermined	86.4	Auto Tm							Automatic Ct		Automatic			Automatic	0.0186667				TRUE		TRUE			TRUE
83	G11	test	FAM	Unknown	Undetermined	75.6	Auto Tm							Automatic Ct		Automatic			Automatic	0.0186667				TRUE		TRUE			TRUE
84	G12	test	FAM	Unknown	Undetermined	65.2	Auto Tm							Automatic Ct		Automatic			Automatic	0.0186667				TRUE		TRUE			TRUE
74	G2	test	FAM	Unknown	9.22132	91.3	Auto Tm							Automatic Ct		Automatic			Automatic	0.0186667				TRUE		TRUE
75	G3	test	FAM	Unknown	Undetermined	86.5	Auto Tm							Automatic Ct		Automatic			Automatic	0.0186667				TRUE		TRUE						TRUE
76	G4	test	FAM	Unknown	Undetermined	91.7	Auto Tm							Automatic Ct		Automatic			Automatic	0.0186667				TRUE		TRUE			TRUE
77	G5	test	FAM	Unknown	9.41961	66.6	Auto Tm							Automatic Ct		Automatic			Automatic	0.0186667				TRUE		TRUE
78	G6	test	FAM	Unknown	Undetermined	66.6	Auto Tm							Automatic Ct		Automatic			Automatic	0.0186667				TRUE		TRUE			TRUE
79	G7	test	FAM	Unknown	Undetermined	66.6	Auto Tm							Automatic Ct		Automatic			Automatic	0.0186667				TRUE		TRUE			TRUE
80	G8	test	FAM	Unknown	Undetermined	92.6	Auto Tm							Automatic Ct		Automatic			Automatic	0.0186667				TRUE		TRUE			TRUE
81	G9	test	FAM	Unknown	Undetermined	62	Auto Tm							Automatic Ct		Automatic			Automatic	0.0186667				TRUE		TRUE			TRUE
85	H1	test	FAM	Unknown	Undetermined	63.2	Auto Tm							Automatic Ct		Automatic			Automatic	0.0186667				TRUE		TRUE			TRUE
94	H10	test	FAM	Unknown	Undetermined	82	Auto Tm							Automatic Ct		Automatic			Automatic	0.0186667				TRUE		TRUE			TRUE
95	H11	test	FAM	Unknown	Undetermined	72.2	Auto Tm							Automatic Ct		Automatic			Automatic	0.0186667				TRUE		TRUE			TRUE
96	H12	test	FAM	Unknown	Undetermined	84.2	Auto Tm							Automatic Ct		Automatic			Automatic	0.0186667				TRUE		TRUE			TRUE
86	H2	test	FAM	Unknown	2.1991	67.2	Auto Tm							Automatic Ct		Automatic			Automatic	0.0186667				TRUE		TRUE
87	H3	test	FAM	Unknown	Undetermined	71.9	Auto Tm							Automatic Ct		Automatic			Automatic	0.0186667				TRUE		TRUE
88	H4	test	FAM	Unknown	Undetermined	86	Auto Tm							Automatic Ct		Automatic			Automatic	0.0186667				TRUE		TRUE			TRUE
89	H5	test	FAM	Unknown	Undetermined	65.6	Auto Tm							Automatic Ct		Automatic			Automatic	0.0186667				TRUE		TRUE			TRUE
90	H6	test	FAM	Unknown	Undetermined	74.2	Auto Tm							Automatic Ct		Automatic			Automatic	0.0186667				TRUE		TRUE			TRUE
91	H7	test	FAM	Unknown	Undetermined	70.6	Auto Tm							Automatic Ct		Automatic			Automatic	0.0186667				TRUE		TRUE			TRUE
92	H8	test	FAM	Unknown	31.8799	70	Auto Tm							Automatic Ct		Automatic			Automatic	0.0186667				TRUE		TRUE
93	H9	test	FAM	Unknown	Undetermined	85	Auto Tm							Automatic Ct		Automatic			Automatic	0.0186667				TRUE		TRUE			TRUE
Slope		cycles/log decade
Y-Intercept
R^2
NAP	LPL

## Sheet: CT circ0008494
SDS 2.4	AQ Results	1
Filename	2019-08-01
PlateID
Assay Type	Absolute Quantification
Run DateTime	2019-08-01 17:45:39
Operator
ThermalCycleParams
Sample Information
Well	Sample Name	Detector Name	Reporter	Task	Ct	Tm Value	Tm Type	Quantity	Qty Mean	Qty StdDev	Ct Median	Ct Mean	Ct StdDev	Ct Type	Template Name	Baseline Type	Baseline Start	Baseline Stop	Threshold Type	Threshold	FOS	HMD	LME	EW	BPR	NAW	HNS	HRN	EAF	BAF	TAF	CAF
1	A1	test	FAM	Unknown	11.7454	85	Auto Tm							Automatic Ct		Automatic			Automatic	1.07229
10	A10	test	FAM	Unknown	20.9671	83.8	Auto Tm							Automatic Ct		Automatic			Automatic	1.07229
11	A11	test	FAM	Unknown	20.9414	83.8	Auto Tm							Automatic Ct		Automatic			Automatic	1.07229
12	A12	test	FAM	Unknown	21.0647	83.6	Auto Tm							Automatic Ct		Automatic			Automatic	1.07229
2	A2	test	FAM	Unknown	11.6007	85	Auto Tm							Automatic Ct		Automatic			Automatic	1.07229
3	A3	test	FAM	Unknown	12.4138	85.2	Auto Tm							Automatic Ct		Automatic			Automatic	1.07229
4	A4	test	FAM	Unknown	21.5838	84.2	Auto Tm							Automatic Ct		Automatic			Automatic	1.07229
5	A5	test	FAM	Unknown	21.2146	84.2	Auto Tm							Automatic Ct		Automatic			Automatic	1.07229
6	A6	test	FAM	Unknown	21.942	84.4	Auto Tm							Automatic Ct		Automatic			Automatic	1.07229
7	A7	test	FAM	Unknown	13.971	85.6	Auto Tm							Automatic Ct		Automatic			Automatic	1.07229
8	A8	test	FAM	Unknown	13.6821	85.3	Auto Tm							Automatic Ct		Automatic			Automatic	1.07229
9	A9	test	FAM	Unknown	11.6524	85.1	Auto Tm							Automatic Ct		Automatic			Automatic	1.07229
13	B1	test	FAM	Unknown	12.3346	85.2	Auto Tm							Automatic Ct		Automatic			Automatic	1.07229
22	B10	test	FAM	Unknown	21.9394	84.2	Auto Tm							Automatic Ct		Automatic			Automatic	1.07229
23	B11	test	FAM	Unknown	21.9164	84	Auto Tm							Automatic Ct		Automatic			Automatic	1.07229
24	B12	test	FAM	Unknown	22.1312	83.8	Auto Tm							Automatic Ct		Automatic			Automatic	1.07229
14	B2	test	FAM	Unknown	12.2255	85.2	Auto Tm							Automatic Ct		Automatic			Automatic	1.07229
15	B3	test	FAM	Unknown	12.3164	85.4	Auto Tm							Automatic Ct		Automatic			Automatic	1.07229
16	B4	test	FAM	Unknown	22.8589	84.8	Auto Tm							Automatic Ct		Automatic			Automatic	1.07229
17	B5	test	FAM	Unknown	23.013	85	Auto Tm							Automatic Ct		Automatic			Automatic	1.07229
18	B6	test	FAM	Unknown	22.9511	85	Auto Tm							Automatic Ct		Automatic			Automatic	1.07229
19	B7	test	FAM	Unknown	14.7824	86	Auto Tm							Automatic Ct		Automatic			Automatic	1.07229
20	B8	test	FAM	Unknown	14.1197	85.6	Auto Tm							Automatic Ct		Automatic			Automatic	1.07229
21	B9	test	FAM	Unknown	14.1761	85.3	Auto Tm							Automatic Ct		Automatic			Automatic	1.07229
25	C1	test	FAM	Unknown	30.7128	85	Auto Tm							Automatic Ct		Automatic			Automatic	1.07229				TRUE
34	C10	test	FAM	Unknown	22.0156	84.3	Auto Tm							Automatic Ct		Automatic			Automatic	1.07229
35	C11	test	FAM	Unknown	21.7399	84.1	Auto Tm							Automatic Ct		Automatic			Automatic	1.07229
36	C12	test	FAM	Unknown	21.8202	83.9	Auto Tm							Automatic Ct		Automatic			Automatic	1.07229
26	C2	test	FAM	Unknown	30.5303	85.2	Auto Tm							Automatic Ct		Automatic			Automatic	1.07229
27	C3	test	FAM	Unknown	30.7132	85.6	Auto Tm							Automatic Ct		Automatic			Automatic	1.07229
28	C4	test	FAM	Unknown	23.8859	85	Auto Tm							Automatic Ct		Automatic			Automatic	1.07229
29	C5	test	FAM	Unknown	23.7911	85.2	Auto Tm							Automatic Ct		Automatic			Automatic	1.07229
30	C6	test	FAM	Unknown	23.7356	85.4	Auto Tm							Automatic Ct		Automatic			Automatic	1.07229
31	C7	test	FAM	Unknown	14.2317	86.1	Auto Tm							Automatic Ct		Automatic			Automatic	1.07229
32	C8	test	FAM	Unknown	11.9398	86	Auto Tm							Automatic Ct		Automatic			Automatic	1.07229
33	C9	test	FAM	Unknown	13.5622	85.7	Auto Tm							Automatic Ct		Automatic			Automatic	1.07229
37	D1	test	FAM	Unknown	13.8924	85.4	Auto Tm							Automatic Ct		Automatic			Automatic	1.07229
46	D10	test	FAM	Unknown	22.215	84.7	Auto Tm							Automatic Ct		Automatic			Automatic	1.07229
47	D11	test	FAM	Unknown	22.4561	84.3	Auto Tm							Automatic Ct		Automatic			Automatic	1.07229
48	D12	test	FAM	Unknown	21.9809	84.1	Auto Tm							Automatic Ct		Automatic			Automatic	1.07229
38	D2	test	FAM	Unknown	12.6768	85.6	Auto Tm							Automatic Ct		Automatic			Automatic	1.07229
39	D3	test	FAM	Unknown	13.9661	86.2	Auto Tm							Automatic Ct		Automatic			Automatic	1.07229
40	D4	test	FAM	Unknown	22.2838	85.2	Auto Tm							Automatic Ct		Automatic			Automatic	1.07229
41	D5	test	FAM	Unknown	22.3384	85.4	Auto Tm							Automatic Ct		Automatic			Automatic	1.07229
42	D6	test	FAM	Unknown	22.3644	85.6	Auto Tm							Automatic Ct		Automatic			Automatic	1.07229
43	D7	test	FAM	Unknown	14.6621	86.5	Auto Tm							Automatic Ct		Automatic			Automatic	1.07229
44	D8	test	FAM	Unknown	11.1623	86.5	Auto Tm							Automatic Ct		Automatic			Automatic	1.07229
45	D9	test	FAM	Unknown	10.8604	86.3	Auto Tm							Automatic Ct		Automatic			Automatic	1.07229
49	E1	test	FAM	Unknown	12.2365	85.4	Auto Tm							Automatic Ct		Automatic			Automatic	1.07229
58	E10	test	FAM	Unknown	22.4906	84.7	Auto Tm							Automatic Ct		Automatic			Automatic	1.07229
59	E11	test	FAM	Unknown	22.089	84.5	Auto Tm							Automatic Ct		Automatic			Automatic	1.07229
60	E12	test	FAM	Unknown	22.3778	84.3	Auto Tm							Automatic Ct		Automatic			Automatic	1.07229
50	E2	test	FAM	Unknown	13.2074	85.6	Auto Tm							Automatic Ct		Automatic			Automatic	1.07229
51	E3	test	FAM	Unknown	13.7648	86.2	Auto Tm							Automatic Ct		Automatic			Automatic	1.07229
52	E4	test	FAM	Unknown	22.0565	85.4	Auto Tm							Automatic Ct		Automatic			Automatic	1.07229
53	E5	test	FAM	Unknown	22.0999	85.6	Auto Tm							Automatic Ct		Automatic			Automatic	1.07229
54	E6	test	FAM	Unknown	22.1488	85.8	Auto Tm							Automatic Ct		Automatic			Automatic	1.07229
55	E7	test	FAM	Unknown	11.6474	86.9	Auto Tm							Automatic Ct		Automatic			Automatic	1.07229
56	E8	test	FAM	Unknown	14.5314	86.7	Auto Tm							Automatic Ct		Automatic			Automatic	1.07229
57	E9	test	FAM	Unknown	11.6326	86.3	Auto Tm							Automatic Ct		Automatic			Automatic	1.07229
61	F1	test	FAM	Unknown	13.6237	85.6	Auto Tm							Automatic Ct		Automatic			Automatic	1.07229
70	F10	test	FAM	Unknown	22.1381	84.7	Auto Tm							Automatic Ct		Automatic			Automatic	1.07229
71	F11	test	FAM	Unknown	21.853	84.5	Auto Tm							Automatic Ct		Automatic			Automatic	1.07229
72	F12	test	FAM	Unknown	22.0591	84.3	Auto Tm							Automatic Ct		Automatic			Automatic	1.07229
62	F2	test	FAM	Unknown	12.1053	85.8	Auto Tm							Automatic Ct		Automatic			Automatic	1.07229
63	F3	test	FAM	Unknown	13.7537	86	Auto Tm							Automatic Ct		Automatic			Automatic	1.07229
64	F4	test	FAM	Unknown	22.4078	85.2	Auto Tm							Automatic Ct		Automatic			Automatic	1.07229
65	F5	test	FAM	Unknown	22.4297	85.4	Auto Tm							Automatic Ct		Automatic			Automatic	1.07229
66	F6	test	FAM	Unknown	22.5226	85.8	Auto Tm							Automatic Ct		Automatic			Automatic	1.07229
67	F7	test	FAM	Unknown	17.6754	86.5	Auto Tm							Automatic Ct		Automatic			Automatic	1.07229
68	F8	test	FAM	Unknown	11.8898	86.5	Auto Tm							Automatic Ct		Automatic			Automatic	1.07229
69	F9	test	FAM	Unknown	14.4168	86.3	Auto Tm							Automatic Ct		Automatic			Automatic	1.07229				TRUE
73	G1	test	FAM	Unknown	12.5352	85.4	Auto Tm							Automatic Ct		Automatic			Automatic	1.07229
82	G10	test	FAM	Unknown	21.7838	84.7	Auto Tm							Automatic Ct		Automatic			Automatic	1.07229
83	G11	test	FAM	Unknown	21.8361	84.5	Auto Tm							Automatic Ct		Automatic			Automatic	1.07229
84	G12	test	FAM	Unknown	21.9127	84.3	Auto Tm							Automatic Ct		Automatic			Automatic	1.07229
74	G2	test	FAM	Unknown	12.4795	85.6	Auto Tm							Automatic Ct		Automatic			Automatic	1.07229
75	G3	test	FAM	Unknown	12.756	86	Auto Tm							Automatic Ct		Automatic			Automatic	1.07229
76	G4	test	FAM	Unknown	22.0949	85	Auto Tm							Automatic Ct		Automatic			Automatic	1.07229
77	G5	test	FAM	Unknown	22.1205	85.2	Auto Tm							Automatic Ct		Automatic			Automatic	1.07229
78	G6	test	FAM	Unknown	22.2701	85.4	Auto Tm							Automatic Ct		Automatic			Automatic	1.07229
79	G7	test	FAM	Unknown	12.2715	86.5	Auto Tm							Automatic Ct		Automatic			Automatic	1.07229
80	G8	test	FAM	Unknown	13.1522	86.3	Auto Tm							Automatic Ct		Automatic			Automatic	1.07229
81	G9	test	FAM	Unknown	14.1135	86.1	Auto Tm							Automatic Ct		Automatic			Automatic	1.07229
85	H1	test	FAM	Unknown	11.6963	85.6	Auto Tm							Automatic Ct		Automatic			Automatic	1.07229
94	H10	test	FAM	Unknown	21.7935	84.5	Auto Tm							Automatic Ct		Automatic			Automatic	1.07229
95	H11	test	FAM	Unknown	21.8901	84.5	Auto Tm							Automatic Ct		Automatic			Automatic	1.07229
96	H12	test	FAM	Unknown	22.1653	84.5	Auto Tm							Automatic Ct		Automatic			Automatic	1.07229
86	H2	test	FAM	Unknown	11.8233	85.6	Auto Tm							Automatic Ct		Automatic			Automatic	1.07229
87	H3	test	FAM	Unknown	12.0415	85.8	Auto Tm							Automatic Ct		Automatic			Automatic	1.07229
88	H4	test	FAM	Unknown	16.2512	84.7	Auto Tm							Automatic Ct		Automatic			Automatic	1.07229								TRUE
89	H5	test	FAM	Unknown	21.6272	85	Auto Tm							Automatic Ct		Automatic			Automatic	1.07229
90	H6	test	FAM	Unknown	21.8044	85.2	Auto Tm							Automatic Ct		Automatic			Automatic	1.07229
91	H7	test	FAM	Unknown	11.7735	86.1	Auto Tm							Automatic Ct		Automatic			Automatic	1.07229
92	H8	test	FAM	Unknown	13.1281	86	Auto Tm							Automatic Ct		Automatic			Automatic	1.07229
93	H9	test	FAM	Unknown	12.6521	85.9	Auto Tm							Automatic Ct		Automatic			Automatic	1.07229
Slope		cycles/log decade
Y-Intercept
R^2
NAP	LPL

## Sheet: CT circ0029332
SDS 2.4	AQ Results	1
Filename	2019-10-15
PlateID
Assay Type	Absolute Quantification
Run DateTime	2019-10-15 16:52:57
Operator
ThermalCycleParams
Sample Information
Well	Sample Name	Detector Name	Reporter	Task	Ct	Tm Value	Tm Type	Quantity	Qty Mean	Qty StdDev	Ct Median	Ct Mean	Ct StdDev	Ct Type	Template Name	Baseline Type	Baseline Start	Baseline Stop	Threshold Type	Threshold	FOS	HMD	LME	EW	BPR	NAW	HNS	HRN	EAF	BAF	TAF	CAF
1	A1	test	FAM	Unknown	14.9045	85.1	Auto Tm							Manual Ct		Manual	3	15	Manual	0.380499
10	A10	test	FAM	Unknown	34.0215	83	Auto Tm							Manual Ct		Manual	3	15	Manual	0.380499
11	A11	test	FAM	Unknown	34.6271	82.6	Auto Tm							Manual Ct		Manual	3	15	Manual	0.380499				TRUE
12	A12	test	FAM	Unknown	34.0766	82.6	Auto Tm							Manual Ct		Manual	3	15	Manual	0.380499
2	A2	test	FAM	Unknown	14.8145	85	Auto Tm							Manual Ct		Manual	3	15	Manual	0.380499
3	A3	test	FAM	Unknown	14.777	85.2	Auto Tm							Manual Ct		Manual	3	15	Manual	0.380499
4	A4	test	FAM	Unknown	Undetermined	61.4	Auto Tm							Manual Ct		Manual	3	15	Manual	0.380499				TRUE		TRUE
5	A5	test	FAM	Unknown	Undetermined	61.4	Auto Tm							Manual Ct		Manual	3	15	Manual	0.380499				TRUE		TRUE
6	A6	test	FAM	Unknown	Undetermined	60.9	Auto Tm							Manual Ct		Manual	3	15	Manual	0.380499				TRUE		TRUE
7	A7	test	FAM	Unknown	22.7734	85	Auto Tm							Manual Ct		Manual	3	15	Manual	0.380499
8	A8	test	FAM	Unknown	23.3511	84.6	Auto Tm							Manual Ct		Manual	3	15	Manual	0.380499
9	A9	test	FAM	Unknown	23.1974	84.2	Auto Tm							Manual Ct		Manual	3	15	Manual	0.380499
13	B1	test	FAM	Unknown	14.5879	85.2	Auto Tm							Manual Ct		Manual	3	15	Manual	0.380499
22	B10	test	FAM	Unknown	31.611	83.4	Auto Tm							Manual Ct		Manual	3	15	Manual	0.380499
23	B11	test	FAM	Unknown	32.6407	83	Auto Tm							Manual Ct		Manual	3	15	Manual	0.380499
24	B12	test	FAM	Unknown	32.3933	82.8	Auto Tm							Manual Ct		Manual	3	15	Manual	0.380499
14	B2	test	FAM	Unknown	14.636	85.4	Auto Tm							Manual Ct		Manual	3	15	Manual	0.380499
15	B3	test	FAM	Unknown	14.65	85.6	Auto Tm							Manual Ct		Manual	3	15	Manual	0.380499
16	B4	test	FAM	Unknown	34.0856	81.9	Auto Tm							Manual Ct		Manual	3	15	Manual	0.380499
17	B5	test	FAM	Unknown	Undetermined	62.1	Auto Tm							Manual Ct		Manual	3	15	Manual	0.380499				TRUE		TRUE
18	B6	test	FAM	Unknown	Undetermined	60.9	Auto Tm							Manual Ct		Manual	3	15	Manual	0.380499				TRUE		TRUE
19	B7	test	FAM	Unknown	22.4658	85.4	Auto Tm							Manual Ct		Manual	3	15	Manual	0.380499
20	B8	test	FAM	Unknown	22.568	85	Auto Tm							Manual Ct		Manual	3	15	Manual	0.380499
21	B9	test	FAM	Unknown	22.7961	84.6	Auto Tm							Manual Ct		Manual	3	15	Manual	0.380499
25	C1	test	FAM	Unknown	15.0744	85.4	Auto Tm							Manual Ct		Manual	3	15	Manual	0.380499
34	C10	test	FAM	Unknown	34.2192	83.6	Auto Tm							Manual Ct		Manual	3	15	Manual	0.380499
35	C11	test	FAM	Unknown	34.2216	83.4	Auto Tm							Manual Ct		Manual	3	15	Manual	0.380499
36	C12	test	FAM	Unknown	35.1412	83	Auto Tm							Manual Ct		Manual	3	15	Manual	0.380499				TRUE
26	C2	test	FAM	Unknown	15.1874	85.8	Auto Tm							Manual Ct		Manual	3	15	Manual	0.380499
27	C3	test	FAM	Unknown	15.2757	86.2	Auto Tm							Manual Ct		Manual	3	15	Manual	0.380499
28	C4	test	FAM	Unknown	Undetermined	61.6	Auto Tm							Manual Ct		Manual	3	15	Manual	0.380499				TRUE		TRUE
29	C5	test	FAM	Unknown	Undetermined	65.4	Auto Tm							Manual Ct		Manual	3	15	Manual	0.380499				TRUE		TRUE
30	C6	test	FAM	Unknown	35.8051	75	Auto Tm							Manual Ct		Manual	3	15	Manual	0.380499				TRUE
31	C7	test	FAM	Unknown	22.6281	85.5	Auto Tm							Manual Ct		Manual	3	15	Manual	0.380499
32	C8	test	FAM	Unknown	22.5373	85.2	Auto Tm							Manual Ct		Manual	3	15	Manual	0.380499
33	C9	test	FAM	Unknown	22.5586	84.9	Auto Tm							Manual Ct		Manual	3	15	Manual	0.380499
37	D1	test	FAM	Unknown	14.5721	85.6	Auto Tm							Manual Ct		Manual	3	15	Manual	0.380499
46	D10	test	FAM	Unknown	32.504	84.4	Auto Tm							Manual Ct		Manual	3	15	Manual	0.380499
47	D11	test	FAM	Unknown	31.495	84	Auto Tm							Manual Ct		Manual	3	15	Manual	0.380499
48	D12	test	FAM	Unknown	32.3165	83.4	Auto Tm							Manual Ct		Manual	3	15	Manual	0.380499
38	D2	test	FAM	Unknown	14.5769	86.6	Auto Tm							Manual Ct		Manual	3	15	Manual	0.380499
39	D3	test	FAM	Unknown	14.5412	87.1	Auto Tm							Manual Ct		Manual	3	15	Manual	0.380499
40	D4	test	FAM	Unknown	Undetermined	61.6	Auto Tm							Manual Ct		Manual	3	15	Manual	0.380499				TRUE		TRUE
41	D5	test	FAM	Unknown	Undetermined	64	Auto Tm							Manual Ct		Manual	3	15	Manual	0.380499				TRUE		TRUE
42	D6	test	FAM	Unknown	Undetermined	62.5	Auto Tm							Manual Ct		Manual	3	15	Manual	0.380499				TRUE		TRUE
43	D7	test	FAM	Unknown	22.392	85.7	Auto Tm							Manual Ct		Manual	3	15	Manual	0.380499
44	D8	test	FAM	Unknown	22.3938	85.4	Auto Tm							Manual Ct		Manual	3	15	Manual	0.380499
45	D9	test	FAM	Unknown	22.7207	85.4	Auto Tm							Manual Ct		Manual	3	15	Manual	0.380499
49	E1	test	FAM	Unknown	14.694	85.6	Auto Tm							Manual Ct		Manual	3	15	Manual	0.380499
58	E10	test	FAM	Unknown	32.3481	84.4	Auto Tm							Manual Ct		Manual	3	15	Manual	0.380499
59	E11	test	FAM	Unknown	33.3904	83.8	Auto Tm							Manual Ct		Manual	3	15	Manual	0.380499
60	E12	test	FAM	Unknown	31.7564	83.4	Auto Tm							Manual Ct		Manual	3	15	Manual	0.380499
50	E2	test	FAM	Unknown	14.6967	86.4	Auto Tm							Manual Ct		Manual	3	15	Manual	0.380499
51	E3	test	FAM	Unknown	14.7287	86.9	Auto Tm							Manual Ct		Manual	3	15	Manual	0.380499
52	E4	test	FAM	Unknown	Undetermined	63.9	Auto Tm							Manual Ct		Manual	3	15	Manual	0.380499				TRUE		TRUE
53	E5	test	FAM	Unknown	Undetermined	63.5	Auto Tm							Manual Ct		Manual	3	15	Manual	0.380499				TRUE		TRUE
54	E6	test	FAM	Unknown	Undetermined	62.3	Auto Tm							Manual Ct		Manual	3	15	Manual	0.380499				TRUE		TRUE
55	E7	test	FAM	Unknown	22.8629	85.7	Auto Tm							Manual Ct		Manual	3	15	Manual	0.380499
56	E8	test	FAM	Unknown	22.9572	85.5	Auto Tm							Manual Ct		Manual	3	15	Manual	0.380499
57	E9	test	FAM	Unknown	23.0153	85.4	Auto Tm							Manual Ct		Manual	3	15	Manual	0.380499
61	F1	test	FAM	Unknown	14.6688	85.4	Auto Tm							Manual Ct		Manual	3	15	Manual	0.380499
70	F10	test	FAM	Unknown	33.5215	83.8	Auto Tm							Manual Ct		Manual	3	15	Manual	0.380499
71	F11	test	FAM	Unknown	32.4925	83.6	Auto Tm							Manual Ct		Manual	3	15	Manual	0.380499
72	F12	test	FAM	Unknown	33.2863	83.4	Auto Tm							Manual Ct		Manual	3	15	Manual	0.380499
62	F2	test	FAM	Unknown	14.704	85.8	Auto Tm							Manual Ct		Manual	3	15	Manual	0.380499
63	F3	test	FAM	Unknown	14.7616	86.2	Auto Tm							Manual Ct		Manual	3	15	Manual	0.380499
64	F4	test	FAM	Unknown	Undetermined	63.1	Auto Tm							Manual Ct		Manual	3	15	Manual	0.380499				TRUE		TRUE
65	F5	test	FAM	Unknown	Undetermined	62.9	Auto Tm							Manual Ct		Manual	3	15	Manual	0.380499				TRUE		TRUE
66	F6	test	FAM	Unknown	Undetermined	60.9	Auto Tm							Manual Ct		Manual	3	15	Manual	0.380499				TRUE		TRUE
67	F7	test	FAM	Unknown	22.6485	85.5	Auto Tm							Manual Ct		Manual	3	15	Manual	0.380499
68	F8	test	FAM	Unknown	22.6164	85.4	Auto Tm							Manual Ct		Manual	3	15	Manual	0.380499
69	F9	test	FAM	Unknown	23.1019	85.1	Auto Tm							Manual Ct		Manual	3	15	Manual	0.380499
73	G1	test	FAM	Unknown	34.1633	75.7	Auto Tm							Manual Ct		Manual	3	15	Manual	0.380499
82	G10	test	FAM	Unknown	36.6891	75.4	Auto Tm							Manual Ct		Manual	3	15	Manual	0.380499				TRUE
83	G11	test	FAM	Unknown	35.3768	75.5	Auto Tm							Manual Ct		Manual	3	15	Manual	0.380499				TRUE
84	G12	test	FAM	Unknown	39.2338	74.8	Auto Tm							Manual Ct		Manual	3	15	Manual	0.380499				TRUE
74	G2	test	FAM	Unknown	33.8585	76.1	Auto Tm							Manual Ct		Manual	3	15	Manual	0.380499
75	G3	test	FAM	Unknown	36.691	75.3	Auto Tm							Manual Ct		Manual	3	15	Manual	0.380499				TRUE
76	G4	test	FAM	Unknown	34.2548	76.6	Auto Tm							Manual Ct		Manual	3	15	Manual	0.380499
77	G5	test	FAM	Unknown	33.4108	77	Auto Tm							Manual Ct		Manual	3	15	Manual	0.380499
78	G6	test	FAM	Unknown	32.2698	76.9	Auto Tm							Manual Ct		Manual	3	15	Manual	0.380499
79	G7	test	FAM	Unknown	33.548	77.1	Auto Tm							Manual Ct		Manual	3	15	Manual	0.380499
80	G8	test	FAM	Unknown	33.5552	76.9	Auto Tm							Manual Ct		Manual	3	15	Manual	0.380499
81	G9	test	FAM	Unknown	36.1632	75.8	Auto Tm							Manual Ct		Manual	3	15	Manual	0.380499				TRUE
85	H1	test	FAM	Unknown	37.1516	74.5	Auto Tm							Manual Ct		Manual	3	15	Manual	0.380499				TRUE
94	H10	test	FAM	Unknown	Undetermined	79.9	Auto Tm							Manual Ct		Manual	3	15	Manual	0.380499				TRUE		TRUE
95	H11	test	FAM	Unknown	Undetermined	86.7	Auto Tm							Manual Ct		Manual	3	15	Manual	0.380499				TRUE		TRUE
96	H12	test	FAM	Unknown	Undetermined	63.8	Auto Tm							Manual Ct		Manual	3	15	Manual	0.380499				TRUE		TRUE
86	H2	test	FAM	Unknown	37.2031	74.7	Auto Tm							Manual Ct		Manual	3	15	Manual	0.380499				TRUE
87	H3	test	FAM	Unknown	33.4011	75.6	Auto Tm							Manual Ct		Manual	3	15	Manual	0.380499
88	H4	test	FAM	Unknown	35.4472	75.4	Auto Tm							Manual Ct		Manual	3	15	Manual	0.380499				TRUE
89	H5	test	FAM	Unknown	35.2766	75.2	Auto Tm							Manual Ct		Manual	3	15	Manual	0.380499				TRUE
90	H6	test	FAM	Unknown	36.9315	75.4	Auto Tm							Manual Ct		Manual	3	15	Manual	0.380499				TRUE
91	H7	test	FAM	Unknown	Undetermined	78.3	Auto Tm							Manual Ct		Manual	3	15	Manual	0.380499				TRUE		TRUE
92	H8	test	FAM	Unknown	Undetermined	61.7	Auto Tm							Manual Ct		Manual	3	15	Manual	0.380499				TRUE		TRUE
93	H9	test	FAM	Unknown	Undetermined	66.8	Auto Tm							Manual Ct		Manual	3	15	Manual	0.380499				TRUE		TRUE
Slope		cycles/log decade
Y-Intercept
R^2
NAP	LPL

## Sheet: CT circ_0110534
SDS 2.4	AQ Results	1
Filename	2019-08-29
PlateID
Assay Type	Absolute Quantification
Run DateTime	2019-08-29 16:50:57
Operator
ThermalCycleParams
Sample Information
Well	Sample Name	Detector Name	Reporter	Task	Ct	Tm Value	Tm Type	Quantity	Qty Mean	Qty StdDev	Ct Median	Ct Mean	Ct StdDev	Ct Type	Template Name	Baseline Type	Baseline Start	Baseline Stop	Threshold Type	Threshold	FOS	HMD	LME	EW	BPR	NAW	HNS	HRN	EAF	BAF	TAF	CAF
1	A1	test	FAM	Unknown	14.851	85.3	Auto Tm							Automatic Ct		Automatic			Automatic	0.358138
10	A10	test	FAM	Unknown	33.1162	76.4	Auto Tm							Automatic Ct		Automatic			Automatic	0.358138
11	A11	test	FAM	Unknown	33.3411	77.1	Auto Tm							Automatic Ct		Automatic			Automatic	0.358138
12	A12	test	FAM	Unknown	33.2286	76.7	Auto Tm							Automatic Ct		Automatic			Automatic	0.358138
2	A2	test	FAM	Unknown	14.3653	85.3	Auto Tm							Automatic Ct		Automatic			Automatic	0.358138
3	A3	test	FAM	Unknown	15.2116	85.4	Auto Tm							Automatic Ct		Automatic			Automatic	0.358138
4	A4	test	FAM	Unknown	21.9046	84.5	Auto Tm							Automatic Ct		Automatic			Automatic	0.358138
5	A5	test	FAM	Unknown	21.8896	84.6	Auto Tm							Automatic Ct		Automatic			Automatic	0.358138
6	A6	test	FAM	Unknown	22.6228	85.2	Auto Tm							Automatic Ct		Automatic			Automatic	0.358138
7	A7	test	FAM	Unknown	29.0634	74.9	Auto Tm							Automatic Ct		Automatic			Automatic	0.358138
8	A8	test	FAM	Unknown	36.5931	73.5	Auto Tm							Automatic Ct		Automatic			Automatic	0.358138				TRUE
9	A9	test	FAM	Unknown	37.0401	72.9	Auto Tm							Automatic Ct		Automatic			Automatic	0.358138				TRUE
13	B1	test	FAM	Unknown	12.5466	85.3	Auto Tm							Automatic Ct		Automatic			Automatic	0.358138
22	B10	test	FAM	Unknown	32.7488	76.7	Auto Tm							Automatic Ct		Automatic			Automatic	0.358138
23	B11	test	FAM	Unknown	37.0282	77.1	Auto Tm							Automatic Ct		Automatic			Automatic	0.358138				TRUE
24	B12	test	FAM	Unknown	33.9637	76.3	Auto Tm							Automatic Ct		Automatic			Automatic	0.358138
14	B2	test	FAM	Unknown	11.9675	85.5	Auto Tm							Automatic Ct		Automatic			Automatic	0.358138
15	B3	test	FAM	Unknown	13.2097	85.8	Auto Tm							Automatic Ct		Automatic			Automatic	0.358138
16	B4	test	FAM	Unknown	21.2882	84.9	Auto Tm							Automatic Ct		Automatic			Automatic	0.358138
17	B5	test	FAM	Unknown	21.404	85.1	Auto Tm							Automatic Ct		Automatic			Automatic	0.358138
18	B6	test	FAM	Unknown	21.6047	85.4	Auto Tm							Automatic Ct		Automatic			Automatic	0.358138
19	B7	test	FAM	Unknown	31.7654	74.9	Auto Tm							Automatic Ct		Automatic			Automatic	0.358138
20	B8	test	FAM	Unknown	34.0885	73.9	Auto Tm							Automatic Ct		Automatic			Automatic	0.358138
21	B9	test	FAM	Unknown	34.4143	73.3	Auto Tm							Automatic Ct		Automatic			Automatic	0.358138				TRUE
25	C1	test	FAM	Unknown	10.2453	85.7	Auto Tm							Automatic Ct		Automatic			Automatic	0.358138
34	C10	test	FAM	Unknown	32.1964	77.7	Auto Tm							Automatic Ct		Automatic			Automatic	0.358138
35	C11	test	FAM	Unknown	36.4456	75	Auto Tm							Automatic Ct		Automatic			Automatic	0.358138				TRUE
36	C12	test	FAM	Unknown	34.8958	76.3	Auto Tm							Automatic Ct		Automatic			Automatic	0.358138				TRUE
26	C2	test	FAM	Unknown	13.2615	86	Auto Tm							Automatic Ct		Automatic			Automatic	0.358138
27	C3	test	FAM	Unknown	13.4625	86.4	Auto Tm							Automatic Ct		Automatic			Automatic	0.358138
28	C4	test	FAM	Unknown	21.6984	85.4	Auto Tm							Automatic Ct		Automatic			Automatic	0.358138
29	C5	test	FAM	Unknown	21.7356	85.4	Auto Tm							Automatic Ct		Automatic			Automatic	0.358138
30	C6	test	FAM	Unknown	22.3925	85.6	Auto Tm							Automatic Ct		Automatic			Automatic	0.358138
31	C7	test	FAM	Unknown	31.9702	74.9	Auto Tm							Automatic Ct		Automatic			Automatic	0.358138
32	C8	test	FAM	Unknown	33.9492	74.1	Auto Tm							Automatic Ct		Automatic			Automatic	0.358138				TRUE
33	C9	test	FAM	Unknown	33.6853	74.1	Auto Tm							Automatic Ct		Automatic			Automatic	0.358138				TRUE
37	D1	test	FAM	Unknown	13.1045	85.9	Auto Tm							Automatic Ct		Automatic			Automatic	0.358138
46	D10	test	FAM	Unknown	33.2899	77.9	Auto Tm							Automatic Ct		Automatic			Automatic	0.358138
47	D11	test	FAM	Unknown	32.7653	76.9	Auto Tm							Automatic Ct		Automatic			Automatic	0.358138
48	D12	test	FAM	Unknown	32.3743	77.1	Auto Tm							Automatic Ct		Automatic			Automatic	0.358138
38	D2	test	FAM	Unknown	12.764	86.6	Auto Tm							Automatic Ct		Automatic			Automatic	0.358138
39	D3	test	FAM	Unknown	14.4919	87.3	Auto Tm							Automatic Ct		Automatic			Automatic	0.358138
40	D4	test	FAM	Unknown	21.6963	86.2	Auto Tm							Automatic Ct		Automatic			Automatic	0.358138
41	D5	test	FAM	Unknown	21.761	86	Auto Tm							Automatic Ct		Automatic			Automatic	0.358138
42	D6	test	FAM	Unknown	22.0567	85.8	Auto Tm							Automatic Ct		Automatic			Automatic	0.358138
43	D7	test	FAM	Unknown	32.8149	75.1	Auto Tm							Automatic Ct		Automatic			Automatic	0.358138
44	D8	test	FAM	Unknown	33.4582	74.9	Auto Tm							Automatic Ct		Automatic			Automatic	0.358138
45	D9	test	FAM	Unknown	35.6807	74.3	Auto Tm							Automatic Ct		Automatic			Automatic	0.358138				TRUE
49	E1	test	FAM	Unknown	12.3896	85.9	Auto Tm							Automatic Ct		Automatic			Automatic	0.358138
58	E10	test	FAM	Unknown	32.1841	78.5	Auto Tm							Automatic Ct		Automatic			Automatic	0.358138
59	E11	test	FAM	Unknown	32.3772	77.3	Auto Tm							Automatic Ct		Automatic			Automatic	0.358138
60	E12	test	FAM	Unknown	36.1981	81.7	Auto Tm							Automatic Ct		Automatic			Automatic	0.358138				TRUE
50	E2	test	FAM	Unknown	12.6972	86.6	Auto Tm							Automatic Ct		Automatic			Automatic	0.358138
51	E3	test	FAM	Unknown	13.6825	87.2	Auto Tm							Automatic Ct		Automatic			Automatic	0.358138
52	E4	test	FAM	Unknown	21.3759	86.2	Auto Tm							Automatic Ct		Automatic			Automatic	0.358138
53	E5	test	FAM	Unknown	21.5319	86	Auto Tm							Automatic Ct		Automatic			Automatic	0.358138
54	E6	test	FAM	Unknown	22.0265	85.8	Auto Tm							Automatic Ct		Automatic			Automatic	0.358138
55	E7	test	FAM	Unknown	36.1587	74.5	Auto Tm							Automatic Ct		Automatic			Automatic	0.358138				TRUE
56	E8	test	FAM	Unknown	33.3986	74.9	Auto Tm							Automatic Ct		Automatic			Automatic	0.358138
57	E9	test	FAM	Unknown	35.0214	74.3	Auto Tm							Automatic Ct		Automatic			Automatic	0.358138				TRUE
61	F1	test	FAM	Unknown	15.2552	85.5	Auto Tm							Automatic Ct		Automatic			Automatic	0.358138
70	F10	test	FAM	Unknown	32.5936	76.9	Auto Tm							Automatic Ct		Automatic			Automatic	0.358138
71	F11	test	FAM	Unknown	32.513	76.9	Auto Tm							Automatic Ct		Automatic			Automatic	0.358138
72	F12	test	FAM	Unknown	35.6278	75	Auto Tm							Automatic Ct		Automatic			Automatic	0.358138				TRUE
62	F2	test	FAM	Unknown	14.3637	86	Auto Tm							Automatic Ct		Automatic			Automatic	0.358138
63	F3	test	FAM	Unknown	15.1119	86.4	Auto Tm							Automatic Ct		Automatic			Automatic	0.358138
64	F4	test	FAM	Unknown	22.4144	85.4	Auto Tm							Automatic Ct		Automatic			Automatic	0.358138
65	F5	test	FAM	Unknown	22.0794	85.4	Auto Tm							Automatic Ct		Automatic			Automatic	0.358138
66	F6	test	FAM	Unknown	22.6551	85.6	Auto Tm							Automatic Ct		Automatic			Automatic	0.358138
67	F7	test	FAM	Unknown	35.0222	74.9	Auto Tm							Automatic Ct		Automatic			Automatic	0.358138				TRUE
68	F8	test	FAM	Unknown	34.0578	74.3	Auto Tm							Automatic Ct		Automatic			Automatic	0.358138				TRUE
69	F9	test	FAM	Unknown	35.8067	73.9	Auto Tm							Automatic Ct		Automatic			Automatic	0.358138				TRUE
73	G1	test	FAM	Unknown	31.6256	78.4	Auto Tm							Automatic Ct		Automatic			Automatic	0.358138
82	G10	test	FAM	Unknown	31.3093	79	Auto Tm							Automatic Ct		Automatic			Automatic	0.358138
83	G11	test	FAM	Unknown	30.8938	78.8	Auto Tm							Automatic Ct		Automatic			Automatic	0.358138
84	G12	test	FAM	Unknown	31.7506	78.4	Auto Tm							Automatic Ct		Automatic			Automatic	0.358138
74	G2	test	FAM	Unknown	31.2311	78.7	Auto Tm							Automatic Ct		Automatic			Automatic	0.358138
75	G3	test	FAM	Unknown	31.6665	78.9	Auto Tm							Automatic Ct		Automatic			Automatic	0.358138
76	G4	test	FAM	Unknown	30.7559	79.3	Auto Tm							Automatic Ct		Automatic			Automatic	0.358138
77	G5	test	FAM	Unknown	30.3185	79.3	Auto Tm							Automatic Ct		Automatic			Automatic	0.358138
78	G6	test	FAM	Unknown	30.7008	79.5	Auto Tm							Automatic Ct		Automatic			Automatic	0.358138
79	G7	test	FAM	Unknown	30.4133	79.6	Auto Tm							Automatic Ct		Automatic			Automatic	0.358138
80	G8	test	FAM	Unknown	31.7015	79.4	Auto Tm							Automatic Ct		Automatic			Automatic	0.358138
81	G9	test	FAM	Unknown	30.9425	79.2	Auto Tm							Automatic Ct		Automatic			Automatic	0.358138
85	H1	test	FAM	Unknown	30.5747	78.6	Auto Tm							Automatic Ct		Automatic			Automatic	0.358138
94	H10	test	FAM	Unknown	Undetermined	74.1	Auto Tm							Automatic Ct		Automatic			Automatic	0.358138				TRUE		TRUE			TRUE
95	H11	test	FAM	Unknown	Undetermined	66.3	Auto Tm							Automatic Ct		Automatic			Automatic	0.358138				TRUE		TRUE			TRUE
96	H12	test	FAM	Unknown	Undetermined	87.5	Auto Tm							Automatic Ct		Automatic			Automatic	0.358138				TRUE		TRUE			TRUE
86	H2	test	FAM	Unknown	30.8692	78.6	Auto Tm							Automatic Ct		Automatic			Automatic	0.358138
87	H3	test	FAM	Unknown	31.4142	78.6	Auto Tm							Automatic Ct		Automatic			Automatic	0.358138
88	H4	test	FAM	Unknown	30.5636	78.9	Auto Tm							Automatic Ct		Automatic			Automatic	0.358138
89	H5	test	FAM	Unknown	30.8744	79.1	Auto Tm							Automatic Ct		Automatic			Automatic	0.358138
90	H6	test	FAM	Unknown	Undetermined	65.4	Auto Tm							Automatic Ct		Automatic			Automatic	0.358138				TRUE		TRUE			TRUE
91	H7	test	FAM	Unknown	Undetermined	86	Auto Tm							Automatic Ct		Automatic			Automatic	0.358138				TRUE		TRUE			TRUE
92	H8	test	FAM	Unknown	Undetermined	91.7	Auto Tm							Automatic Ct		Automatic			Automatic	0.358138				TRUE		TRUE
93	H9	test	FAM	Unknown	Undetermined	75.4	Auto Tm							Automatic Ct		Automatic			Automatic	0.358138				TRUE		TRUE			TRUE
Slope		cycles/log decade
Y-Intercept
R^2
NAP	LPL

## Sheet: CT circ_0013617
SDS 2.4	AQ Results	1
Filename	2019-08-08
PlateID
Assay Type	Absolute Quantification
Run DateTime	2019-08-08 17:36:18
Operator
ThermalCycleParams
Sample Information
Well	Sample Name	Detector Name	Reporter	Task	Ct	Tm Value	Tm Type	Quantity	Qty Mean	Qty StdDev	Ct Median	Ct Mean	Ct StdDev	Ct Type	Template Name	Baseline Type	Baseline Start	Baseline Stop	Threshold Type	Threshold	FOS	HMD	LME	EW	BPR	NAW	HNS	HRN	EAF	BAF	TAF	CAF
1	A1	test	FAM	Unknown	13.896	84.8	Auto Tm							Manual Ct		Manual	3	15	Manual	0.0433633				TRUE
10	A10	test	FAM	Unknown	26.4285	83	Auto Tm							Manual Ct		Manual	3	15	Manual	0.0433633
11	A11	test	FAM	Unknown	25.3407	82.8	Auto Tm							Manual Ct		Manual	3	15	Manual	0.0433633
12	A12	test	FAM	Unknown	26.6107	82.8	Auto Tm							Manual Ct		Manual	3	15	Manual	0.0433633
2	A2	test	FAM	Unknown	14.0923	85	Auto Tm							Manual Ct		Manual	3	15	Manual	0.0433633				TRUE
3	A3	test	FAM	Unknown	14.1813	85.2	Auto Tm							Manual Ct		Manual	3	15	Manual	0.0433633				TRUE
4	A4	test	FAM	Unknown	32.8036	75.8	Auto Tm							Manual Ct		Manual	3	15	Manual	0.0433633				TRUE
5	A5	test	FAM	Unknown	36.5547	75.8	Auto Tm							Manual Ct		Manual	3	15	Manual	0.0433633				TRUE
6	A6	test	FAM	Unknown	33.2453	80.6	Auto Tm							Manual Ct		Manual	3	15	Manual	0.0433633				TRUE
7	A7	test	FAM	Unknown	Undetermined	77.9	Auto Tm							Manual Ct		Manual	3	15	Manual	0.0433633				TRUE		TRUE
8	A8	test	FAM	Unknown	33.5058	73.1	Auto Tm							Manual Ct		Manual	3	15	Manual	0.0433633				TRUE
9	A9	test	FAM	Unknown	1.29828	62.3	Auto Tm							Manual Ct		Manual	3	15	Manual	0.0433633				TRUE		TRUE
13	B1	test	FAM	Unknown	13.8345	85	Auto Tm							Manual Ct		Manual	3	15	Manual	0.0433633
22	B10	test	FAM	Unknown	24.203	83.2	Auto Tm							Manual Ct		Manual	3	15	Manual	0.0433633
23	B11	test	FAM	Unknown	20.2721	83.2	Auto Tm							Manual Ct		Manual	3	15	Manual	0.0433633
24	B12	test	FAM	Unknown	23.8943	82.8	Auto Tm							Manual Ct		Manual	3	15	Manual	0.0433633
14	B2	test	FAM	Unknown	13.8007	85.2	Auto Tm							Manual Ct		Manual	3	15	Manual	0.0433633
15	B3	test	FAM	Unknown	13.7752	85.2	Auto Tm							Manual Ct		Manual	3	15	Manual	0.0433633				TRUE
16	B4	test	FAM	Unknown	Undetermined	64.7	Auto Tm							Manual Ct		Manual	3	15	Manual	0.0433633				TRUE		TRUE
17	B5	test	FAM	Unknown	34.8618	74.7	Auto Tm							Manual Ct		Manual	3	15	Manual	0.0433633				TRUE
18	B6	test	FAM	Unknown	Undetermined	63.5	Auto Tm							Manual Ct		Manual	3	15	Manual	0.0433633				TRUE		TRUE
19	B7	test	FAM	Unknown	35.9482	73.7	Auto Tm							Manual Ct		Manual	3	15	Manual	0.0433633				TRUE
20	B8	test	FAM	Unknown	34.4899	73.9	Auto Tm							Manual Ct		Manual	3	15	Manual	0.0433633				TRUE
21	B9	test	FAM	Unknown	31.8792	73.7	Auto Tm							Manual Ct		Manual	3	15	Manual	0.0433633				TRUE
25	C1	test	FAM	Unknown	13.7718	85.2	Auto Tm							Manual Ct		Manual	3	15	Manual	0.0433633				TRUE
34	C10	test	FAM	Unknown	Undetermined	83.6	Auto Tm							Manual Ct		Manual	3	15	Manual	0.0433633
35	C11	test	FAM	Unknown	20.7448	83.4	Auto Tm							Manual Ct		Manual	3	15	Manual	0.0433633
36	C12	test	FAM	Unknown	24.6763	83	Auto Tm							Manual Ct		Manual	3	15	Manual	0.0433633
26	C2	test	FAM	Unknown	13.8617	85.4	Auto Tm							Manual Ct		Manual	3	15	Manual	0.0433633				TRUE
27	C3	test	FAM	Unknown	13.8702	85.6	Auto Tm							Manual Ct		Manual	3	15	Manual	0.0433633				TRUE
28	C4	test	FAM	Unknown	34.6933	76.6	Auto Tm							Manual Ct		Manual	3	15	Manual	0.0433633				TRUE
29	C5	test	FAM	Unknown	13.8358	63.1	Auto Tm							Manual Ct		Manual	3	15	Manual	0.0433633				TRUE		TRUE
30	C6	test	FAM	Unknown	34.5966	76.4	Auto Tm							Manual Ct		Manual	3	15	Manual	0.0433633				TRUE
31	C7	test	FAM	Unknown	37.2577	74.1	Auto Tm							Manual Ct		Manual	3	15	Manual	0.0433633				TRUE
32	C8	test	FAM	Unknown	12.7982	62.9	Auto Tm							Manual Ct		Manual	3	15	Manual	0.0433633				TRUE		TRUE
33	C9	test	FAM	Unknown	Undetermined	64.6	Auto Tm							Manual Ct		Manual	3	15	Manual	0.0433633				TRUE		TRUE
37	D1	test	FAM	Unknown	13.9359	85.4	Auto Tm							Manual Ct		Manual	3	15	Manual	0.0433633
46	D10	test	FAM	Unknown	20.0844	84	Auto Tm							Manual Ct		Manual	3	15	Manual	0.0433633
47	D11	test	FAM	Unknown	24.0672	83.6	Auto Tm							Manual Ct		Manual	3	15	Manual	0.0433633
48	D12	test	FAM	Unknown	24.8743	83.2	Auto Tm							Manual Ct		Manual	3	15	Manual	0.0433633
38	D2	test	FAM	Unknown	13.8845	85.6	Auto Tm							Manual Ct		Manual	3	15	Manual	0.0433633				TRUE
39	D3	test	FAM	Unknown	13.8404	86	Auto Tm							Manual Ct		Manual	3	15	Manual	0.0433633				TRUE
40	D4	test	FAM	Unknown	38.1247	76.6	Auto Tm							Manual Ct		Manual	3	15	Manual	0.0433633				TRUE		TRUE
41	D5	test	FAM	Unknown	Undetermined	61.2	Auto Tm							Manual Ct		Manual	3	15	Manual	0.0433633				TRUE		TRUE
42	D6	test	FAM	Unknown	33.6473	77.3	Auto Tm							Manual Ct		Manual	3	15	Manual	0.0433633				TRUE
43	D7	test	FAM	Unknown	Undetermined	74.5	Auto Tm							Manual Ct		Manual	3	15	Manual	0.0433633				TRUE
44	D8	test	FAM	Unknown	36.4888	76.2	Auto Tm							Manual Ct		Manual	3	15	Manual	0.0433633				TRUE
45	D9	test	FAM	Unknown	Undetermined	64	Auto Tm							Manual Ct		Manual	3	15	Manual	0.0433633				TRUE		TRUE
49	E1	test	FAM	Unknown	13.7266	85.4	Auto Tm							Manual Ct		Manual	3	15	Manual	0.0433633
58	E10	test	FAM	Unknown	23.7255	84	Auto Tm							Manual Ct		Manual	3	15	Manual	0.0433633
59	E11	test	FAM	Unknown	23.9243	83.6	Auto Tm							Manual Ct		Manual	3	15	Manual	0.0433633
60	E12	test	FAM	Unknown	23.6201	83.4	Auto Tm							Manual Ct		Manual	3	15	Manual	0.0433633
50	E2	test	FAM	Unknown	13.7682	85.6	Auto Tm							Manual Ct		Manual	3	15	Manual	0.0433633
51	E3	test	FAM	Unknown	13.7674	86	Auto Tm							Manual Ct		Manual	3	15	Manual	0.0433633
52	E4	test	FAM	Unknown	36.0888	77.4	Auto Tm							Manual Ct		Manual	3	15	Manual	0.0433633				TRUE
53	E5	test	FAM	Unknown	35.8472	77.2	Auto Tm							Manual Ct		Manual	3	15	Manual	0.0433633				TRUE
54	E6	test	FAM	Unknown	19.9938	61.2	Auto Tm							Manual Ct		Manual	3	15	Manual	0.0433633				TRUE		TRUE
55	E7	test	FAM	Unknown	34.3312	74.7	Auto Tm							Manual Ct		Manual	3	15	Manual	0.0433633				TRUE
56	E8	test	FAM	Unknown	34.7921	74.5	Auto Tm							Manual Ct		Manual	3	15	Manual	0.0433633				TRUE
57	E9	test	FAM	Unknown	Undetermined	62.1	Auto Tm							Manual Ct		Manual	3	15	Manual	0.0433633				TRUE		TRUE
61	F1	test	FAM	Unknown	13.7029	85.4	Auto Tm							Manual Ct		Manual	3	15	Manual	0.0433633				TRUE
70	F10	test	FAM	Unknown	24.8006	83.8	Auto Tm							Manual Ct		Manual	3	15	Manual	0.0433633
71	F11	test	FAM	Unknown	24.4341	83.6	Auto Tm							Manual Ct		Manual	3	15	Manual	0.0433633
72	F12	test	FAM	Unknown	21.3802	83.4	Auto Tm							Manual Ct		Manual	3	15	Manual	0.0433633
62	F2	test	FAM	Unknown	13.709	85.6	Auto Tm							Manual Ct		Manual	3	15	Manual	0.0433633				TRUE
63	F3	test	FAM	Unknown	13.7369	86	Auto Tm							Manual Ct		Manual	3	15	Manual	0.0433633				TRUE
64	F4	test	FAM	Unknown	Undetermined	61.7	Auto Tm							Manual Ct		Manual	3	15	Manual	0.0433633				TRUE		TRUE
65	F5	test	FAM	Unknown	Undetermined	61.3	Auto Tm							Manual Ct		Manual	3	15	Manual	0.0433633				TRUE		TRUE
66	F6	test	FAM	Unknown	34.055	77	Auto Tm							Manual Ct		Manual	3	15	Manual	0.0433633				TRUE
67	F7	test	FAM	Unknown	Undetermined	61.2	Auto Tm							Manual Ct		Manual	3	15	Manual	0.0433633				TRUE		TRUE
68	F8	test	FAM	Unknown	Undetermined	61.8	Auto Tm							Manual Ct		Manual	3	15	Manual	0.0433633				TRUE		TRUE
69	F9	test	FAM	Unknown	34.7638	74.1	Auto Tm							Manual Ct		Manual	3	15	Manual	0.0433633				TRUE
73	G1	test	FAM	Unknown	36.9095	74.7	Auto Tm							Manual Ct		Manual	3	15	Manual	0.0433633				TRUE
82	G10	test	FAM	Unknown	35.3737	76.7	Auto Tm							Manual Ct		Manual	3	15	Manual	0.0433633				TRUE
83	G11	test	FAM	Unknown	Undetermined	61.1	Auto Tm							Manual Ct		Manual	3	15	Manual	0.0433633				TRUE		TRUE
84	G12	test	FAM	Unknown	33.0844	76.7	Auto Tm							Manual Ct		Manual	3	15	Manual	0.0433633				TRUE
74	G2	test	FAM	Unknown	28.7574	77.2	Auto Tm							Manual Ct		Manual	3	15	Manual	0.0433633				TRUE		TRUE
75	G3	test	FAM	Unknown	34.0563	75.7	Auto Tm							Manual Ct		Manual	3	15	Manual	0.0433633				TRUE
76	G4	test	FAM	Unknown	35.3453	76	Auto Tm							Manual Ct		Manual	3	15	Manual	0.0433633				TRUE
77	G5	test	FAM	Unknown	Undetermined	65	Auto Tm							Manual Ct		Manual	3	15	Manual	0.0433633				TRUE		TRUE
78	G6	test	FAM	Unknown	32.8575	78.1	Auto Tm							Manual Ct		Manual	3	15	Manual	0.0433633				TRUE
79	G7	test	FAM	Unknown	33.8834	76.4	Auto Tm							Manual Ct		Manual	3	15	Manual	0.0433633				TRUE
80	G8	test	FAM	Unknown	Undetermined	64.2	Auto Tm							Manual Ct		Manual	3	15	Manual	0.0433633				TRUE		TRUE
81	G9	test	FAM	Unknown	11.865	70.1	Auto Tm							Manual Ct		Manual	3	15	Manual	0.0433633				TRUE		TRUE
85	H1	test	FAM	Unknown	11.4569	61.2	Auto Tm							Manual Ct		Manual	3	15	Manual	0.0433633				TRUE		TRUE
94	H10	test	FAM	Unknown	1.40941	73.9	Auto Tm							Manual Ct		Manual	3	15	Manual	0.0433633				TRUE		TRUE
95	H11	test	FAM	Unknown	10.6946	76.9	Auto Tm							Manual Ct		Manual	3	15	Manual	0.0433633				TRUE		TRUE
96	H12	test	FAM	Unknown	6.80833	82.6	Auto Tm							Manual Ct		Manual	3	15	Manual	0.0433633				TRUE		TRUE
86	H2	test	FAM	Unknown	30.4618	64.5	Auto Tm							Manual Ct		Manual	3	15	Manual	0.0433633				TRUE		TRUE
87	H3	test	FAM	Unknown	Undetermined	76.1	Auto Tm							Manual Ct		Manual	3	15	Manual	0.0433633				TRUE		TRUE
88	H4	test	FAM	Unknown	33.2437	74.9	Auto Tm							Manual Ct		Manual	3	15	Manual	0.0433633				TRUE
89	H5	test	FAM	Unknown	Undetermined	61.8	Auto Tm							Manual Ct		Manual	3	15	Manual	0.0433633				TRUE		TRUE
90	H6	test	FAM	Unknown	33.6688	76	Auto Tm							Manual Ct		Manual	3	15	Manual	0.0433633				TRUE
91	H7	test	FAM	Unknown	27.5923	92.5	Auto Tm							Manual Ct		Manual	3	15	Manual	0.0433633				TRUE		TRUE
92	H8	test	FAM	Unknown	5.89567	80	Auto Tm							Manual Ct		Manual	3	15	Manual	0.0433633				TRUE		TRUE
93	H9	test	FAM	Unknown	Undetermined	68	Auto Tm							Manual Ct		Manual	3	15	Manual	0.0433633				TRUE		TRUE
Slope		cycles/log decade
Y-Intercept
R^2
NAP	LPL
